# Supplementary material for: Biclustering via optimal re-ordering of data matrices in systems biology: rigorous methods and comparative studies
Source: Springer Nature journal article supplement (doi:10.1186/1471-2105-9-458), 2008-10-27
Supplement: 12859_2008_2443_MOESM1_ESM.pdf [file 12859_2008_2443_MOESM1_ESM.pdf]

## Supplementary Material for Biclustering via Optimal Re-ordering of Data Matrices

### Case Study 1: Biclustering Results for Metabolite Concentration Data

The optimally re-ordered metabolites for region A for OREO result in a dense grouping of the amino acids and biosynthetic intermediates under the conditions of nitrogen starvation in *S. cerevisiae*. One should note the almost monotonic behavior of the concentration profile, which groups the decreasing concentrations at the top and the increasing concentrations at the bottom of the matrix. The twelve amino acids glycine, asparagine, serine, alanine, methionine, threonine, histidine, aspartate, tryptophan, phenylalanine, isoleucine, and valine are found in a cluster of 26 metabolites. There is also a strong aggregation of the biosynthetic intermediates carbamoyl-aspartate, ornithine, dihydrooroate, N-acetyl-ornithine, IMP, cystathionine, and orotic acid in the first nine rows of the data matrix. This supports the observation that most biosynthetic intermediates decrease in concentration over all starvation conditions based on the hypothesis that the cells turn off de novo biosynthesis as an early, strong, and consistent response to nutrient deprivation [1]. One should also note that carbamoyl-aspartate and dihydrooroate, separated by only two positions in the final ordering, are both on the pyrimidine pathway [1].

### Case Study 1: Results for Other Biclustering Methods for Metabolite Concentration Data

The results for Cheng and Church's Algorithm [2] reported a total of 10 biclusters. A bicluster of 30 metabolites contained 15 of the 18 metabolites assigned to the amino acid category [1] over various conditions related to carbon and nitrogen starvation in *E. coli* and *S. cerevisiae*. The longest consecutive ordering of amino acids within this bicluster are serine, methionine, threonine, glutamate, and alanine, which is exactly the same as that reported in the hierarchical clustering results. The majority of the other metabolites in this bicluster are biosynthetic intermediates. The remaining nine

biclusters do not result in any consistent grouping of related metabolites, although three biclusters contain only nitrogen starvation conditions and two biclusters contain only two nitrogen starvation conditions for *E. coli* and *S. cerevisiae*. In fact, one of the biclusters contains all of the nitrogen starvation conditions for *E. coli*. Only one bicluster was reported from the ISA algorithm [3]. The four metabolites in this bicluster are acetyl-coa, aspartate, ADP, and cAMP, under the conditions of carbon starvation in *E. coli*. Acetyl-coa is a TCA cycle compound and aspartate is categorized as a amino acid metabolite [1], so there is no direct relationship between the metabolites identified in this bicluster. The OPSM Algorithm [4] produced a bicluster that contained the amino acid metabolites valine, isoleucine, alanine, phosphoenolpyruvate, ATP, proline, asparagine, and glutamate under the conditions of nitrogen and carbon starvation in *S. cerevisiae* and *E. coli*. The other OPSM biclusters revealed little correlation among the metabolites grouped together. The BiMax Algorithm [5] resulted in several biclusters of increased concentration and many of the metabolites were assigned to at least three biclusters. However, little relation among the metabolites in the BiMax biclusters was found. The SAMBA Algorithm [6] was also applied to the metabolite concentration data and resulted in a total of three biclusters with little overlap of the metabolites. No apparent grouping of related metabolites was observed for these biclusters.

[Figure 1 about here.]

[Figure 2 about here.]

[Figure 3 about here.]

[Figure 4 about here.]

[Figure 5 about here.]

[Figure 6 about here.]

[Figure 7 about here.]

## Case Study 2: Image Reconstruction (Lenna Image)

When optimally re-ordering the replicated data matrix using OREO, we see in Figure S.8 that we do recover a stretched version of the original image. In Figure S.8, we see that the Memetic algorithm [7] was also able to recover the elongated image, whereas the two hierarchical clustering methods and CLICK [8] could not. The agglomerative hierarchical clustering algorithm [9] recovers most of the image but misplaces an entire subsection near the top. The European Bioinformatics Initiative (EBI) hierarchical clustering algorithm [10] and CLICK partition the image into choppy subsections with no continuity between them.

[Figure 8 about here.]

In the original study [11], it was also shown that re-ordering over the 100 adjacent columns centered in the region of the eyes proved to be the most difficult task for all of the clustering methods. In Figure S.9 we present the results for all of the algorithms, where it can be seen that only OREO and the Memetic algorithm recover the original image. Note that in contrast to the previous examples, agglomerative hierarchical clustering performs significantly worse and partitions the original image into several subclusters, as do EBI hierarchical clustering algorithm and CLICK.

[Figure 9 about here.]

## Case Study 3: Synthetic Data with Implanted Biclusters

In Figures S.10 through S.17 we present the average bicluster relevance and average module recovery for the results of OREO for the synthetic data set with implanted biclusters presented in [5].

[Figure 10 about here.]

[Figure 11 about here.]

[Figure 12 about here.]

[Figure 13 about here.]

[Figure 14 about here.]

[Figure 15 about here.]

[Figure 16 about here.]

[Figure 17 about here.]

#### **Cancer Study 4: Colon Cancer Data**

The exact classification of the tissues are presented in Table S.1 for the method presented in Alon et al. and OREO for colon cancer data set [12].

[Table 1 about here.]

#### **Case Studies 1, 4, and 5: Plots of Correlation Values for Biclustering Results**

In Figures S.18 through S.29, we present the average correlation among the rows and columns as a function of (1) the bicluster area (the number of rows times the number of columns in a bicluster), (2) the number of rows per bicluster, and (3) the number of columns per bicluster for the (a) metabolite concentration data, (b) colon cancer data, and (c) breast cancer data sets. Discussions for these figures are provided in the main text of the article.

[Figure 18 about here.]

[Figure 19 about here.]

[Figure 20 about here.]

[Figure 21 about here.]

[Figure 22 about here.]

[Figure 23 about here.]

[Figure 24 about here.]

[Figure 25 about here.]

[Figure 26 about here.]

[Figure 27 about here.]

[Figure 28 about here.]

[Figure 29 about here.]

### **Case Study 6: Curated Gene Ontology Network and nsNMF Results for Yeast Segregant Gene Expression Data**

We examined biological processes from a curated gene ontology network for *S. cerevisiae* as judged by a panel of expert scientists [13]. From this curated data set of 295 biological processes, we extracted those that are annotated to at least ten or more genes. This screening process resulted in a total 130 biological processes for subsequent analysis. Out of the 6216 genes analyzed in the experiment, 4152 are annotated to at least one of these 130 selected processes. For the remaining genes that were not annotated to any of the 130 processes, we created an “un-annotated” process to analyze their placements relative to the annotated genes.

The metric presented in Equation 16 in the text avoids bias towards processes that are annotated to a large number of genes in the experiment. For instance, processes such as translation and ribosomal biogenesis and assembly that are annotated to 683 and 331 genes, respectively, are more likely to be found grouped together random than processes that are annotated to a small subset of genes, like aldehyde metabolism (annotated to 21 genes) and carbohydrate transport (annotated to 36 genes). Equation 16 effectively accomplishes the task of properly weighting the enrichment contributions of processes annotated to only a small number of genes but are considered important [13] like aldehyde metabolism and carbohydrate transport.

We also queried the top 200 genes from nsNMF after sorting on the basis conditions using the Gene Ontology Term Finder (<http://db.yeastgenome.org/cgi-bin/GO/goTermFinder.pl>) to examine if enrichment was achieved for specific biological processes. Sorting on factor 1 resulted in a significant grouping of genes annotated to the energy reserve metabolic process (P-value =  $3.81 \times 10^{-13}$ ). The genes based on sorting on factor 2 were significantly annotated to the RNA-mediated transposition process (P-value =  $1.50 \times 10^{-18}$ ) and the richest annotation of genes was found from sorting on factor 3 for the amino acid metabolic process (P-value =  $8.04 \times 10^{-22}$ ). Sorting the genes based on the fourth factor resulted in a significant grouping that was annotated to the telomere maintenance via recombination process (P-value =  $1.40 \times 10^{-4}$ ). This indicates that although the orderings of genes provided by the individual factors for nsNMF do not result in a significant overall enrichment (presented in Figure 4), they do produce significant groupings of genes related to important biological processes.

### **Additional Gene Expression Data Set: Budding Yeast Gene Expression Data**

Another data set commonly studied in the literature is an aggregation of experiments on budding yeast, consisting of 6,222 genes and 80 experimental conditions [9]. In the original study, hierarchical clustering was applied to the 2,4567 genes that had a functional annotation in the Saccharomyces Genome Database. It was shown that genes of similar function cluster together, and in particular genes encoding: (a) ribosomal proteins, (b) respiration, (c) ATP synthesis and oxidative phosphorylation, (d) components of the proteasome, (e) DNA replication, (f) the tricarboxylic acid cycle and oxidative phosphorylation, (g) glycolytic enzymes, and (h) protein synthesis [9].

This data set was analyzed in another study [11] by a Memetic and hierarchical clustering algorithm, where several clusters annotated to specific functional groups were presented. Specifically, the Memetic and hierarchical clustering algorithm were applied to the 3,222 genes without missing values and the clusters that were reported

were annotated to the functions “protein synthesis” (similar to (h)) , “protein degradation” (similar to (d)), “ATP synthesis + oxidative phosphorylation + TCA cycle” (combinations of (c) and (f)), and “sterol metabolism”. We optimally reordered the 3,222 genes using OREO (results available as another file in Supplementary Material) and compared our results to the previous findings [9, 11].

We observed a large clustering of genes encoding “protein synthesis” (78 genes), which is consistent with all the other methods, as each was able to find a clustering of at least 70 of these terms. The most variability in the results was found in the clustering of the smaller functional groups. Note that the functional groups for the clusters presented for the Memetic algorithm [11] are very similar to the ones described in the original study (namely “protein degradation” and “ATP synthesis + oxidative phosphorylation + TCA cycle”) . Our method also uncovers clusters enriched in these molecular functions, where our clusters for “oxidative phosphorylation” are separated into “ATP + oxidative phosphorylation” (8 genes) and “TCA + oxidative phosphorylation” (7 genes), which is consistent with the findings of the original study [9]. The hierarchical clustering algorithm also produced this partitioning of the genes encoding “oxidative phosphorylation”. Another consistency with the original study is that our cluster of genes associated with the function “protein degradation” (12 genes) was found to be rich in those genes encoding the components of the proteasome. The “protein degradation” cluster for the Memetic algorithm was found to have a similar number of proteasome genes (14 genes), whereas the hierarchical clustering algorithm was able to cluster together 18 proteasome genes [7].

The only functional group reported by [11] that was not presented in the original study was “sterol metabolism”, where the Memetic algorithm, hierarchical clustering algorithm, and OREO reported clusters of 7, 4, and 5 genes annotated to this function, respectively. Several other clusters were found by OREO that were consistent with the findings in the original study, such as “glycolysis” (8 genes), “DNA replication” (5 genes), and “spindle pole body assembly and function” (8 genes). We also analyzed our results for clusters associated with more interesting molecular functions

not reported in the earlier studies. For instance, we discovered a tight cluster containing all 6 histone genes in consecutive ordering, which is similar to the histone cluster presented in the original study, except our cluster also contains Histone H1. There is another interesting cluster containing 7 genes associated with the functions of MRNA and TRNA splicing, processing, and exporting. When searching the entire set of genes, there are only 14 functional annotations associated with membrane proteins and our method produces a tight cluster consisting of 4 genes corresponding to membrane protein functions, 3 of which are vacuolar proteins. Of the 8 genes associated with peroxisome biogenesis, we found a cluster of 4 within a span of 13 genes, whereas these genes were scattered in the original hierarchical clustering results. There are also two clusters in which genes associated with asparagine utilization (4 genes in cluster, 7 in total data set) and allantoin utilization (3 genes in cluster, 4 in total data set) are consecutively ordered. Lastly, there is an interesting cluster of 6 genes associated with various amino acid biogenesis functions (arginine, isoleucine and valine, threonine and methionine, and histidine biosynthesis) that were not found when examining the results of the original study.

**Table S.2 - Ontology results for Alon et al. colon cancer data for all biclustering algorithms**

Ontology results obtained for the biclustering algorithms Cheng and Church, ISA, OPSM, xMotif, OREO, nsNMF, and SAMBA using Onto-Express for the Alon et al. colon cancer data set. A hypergeometric distribution was used and the reference array was specified to be the 2,000 genes analyzed. Biclusters are only reported for each method if they have a p-value less than 0.01.

**Cheng and Church's Biclusters**



| Cluster No. | No. genes | molecular function                  | biological process                 |
|-------------|-----------|-------------------------------------|------------------------------------|
| 2           | 72        | peroxiredoxin activity              | response to oxidative stress       |
| 3           | 11        | deoxyguanosine kinase activity      | guanosine metabolic process        |
| 4           | 6         | tyrosine 3-monooxygenase activity   | catecholamine biosynthetic process |
| 5           | 5         | single-stranded RNA binding         | RNA destabilization                |
| 6           | 3         | GDP-dissociation inhibitor activity | G-protein signaling                |
| 10          | 3         | fucosyltransferase activity         | L-fucose catabolic process         |

#### **ISA Biclusters**

| Cluster No. | No. genes | molecular function                                           | biological process                                      |
|-------------|-----------|--------------------------------------------------------------|---------------------------------------------------------|
| 1           | 128       | transmembrane receptor protein tyrosine phosphatase activity | negative regulation of protein kinase activity          |
| 2           | 111       | cAMP-dependent protein kinase activity                       | transcription                                           |
| 3           | 98        | threonine endopeptidase activity                             | ubiquitin-dependent protein catabolic process           |
| 4           | 130       | vinculin binding transforming growth factor beta             | receptor signaling pathway                              |
| 5           | 97        | threonine endopeptidase activity                             | ubiquitin-dependent protein catabolic process           |
| 6           | 96        | nucleotide binding                                           | ubiquitin-dependent protein catabolic process           |
| 7           | 81        | cadmium ion binding                                          | none                                                    |
| 8           | 148       | ligase activity                                              | regulation of small GTPase mediated signal transduction |
| 9           | 147       | ligase activity                                              | regulation of small GTPase mediated signal transduction |
| 10          | 87        | transcription activator                                      | ubiquitin-dependent protein catabolic process           |

#### **OPSM Biclusters**

| Cluster No. | No. genes | molecular function                            | biological process                                      |
|-------------|-----------|-----------------------------------------------|---------------------------------------------------------|
| 2           | 3         | mRNA 3'-UTR binding                           | cell differentiation                                    |
| 3           | 4         | formyltetrahydrofolate dehydrogenase activity | 10-formyltetrahydrofolate catabolic process             |
| 4           | 6         | phosphatase binding                           | cell-cell adhesion                                      |
| 5           | 11        | 3'-5-' exonuclease activity                   | regulation of cell redox homeostasis                    |
| 6           | 25        | none                                          | mRNA catabolic process                                  |
| 7           | 48        | DNA binding                                   | regulation of small GTPase mediated signal transduction |
| 8           | 94        | nucleotide binding                            | protein amino acid phosphorylation                      |
| 9           | 226       | ATP binding                                   | protein amino acid phosphorylation                      |
| 10          | 456       | actin binding                                 | Wnt receptor signaling pathway                          |

#### **xMotif Biclusters**

| Cluster No. | No. genes | molecular function                          | biological process      |
|-------------|-----------|---------------------------------------------|-------------------------|
| 1           | 562       | nucleotide binding                          | cell migration          |
| 2           | 505       | none                                        | cell migration          |
| 3           | 494       | none                                        | immune response         |
| 4           | 491       | identical protein binding                   | none                    |
| 5           | 480       | extracellular matrix structural constituent | translation             |
| 6           | 473       | none                                        | notch signaling pathway |
| 7           | 473       | protein serine/threonine kinase activity    | cell migration          |
| 8           | 471       | receptor binding                            | immune response         |
| 9           | 467       | nucleotide binding                          | immune response         |
| 10          | 467       | none                                        | immune response         |
| 11          | 467       | none                                        | immune response         |
| 12          | 462       | none                                        | immune response         |

#### **OREO Biclusters**

| Cluster No. | No. genes | molecular function                 | biological process                                |
|-------------|-----------|------------------------------------|---------------------------------------------------|
| 1           | 97        | structural constituent of ribosome | translation                                       |
| 2           | 41        | structural constituent of ribosome | translation                                       |
| 3           | 114       | structural constituent of ribosome | translation                                       |
| 4           | 69        | structural constituent of ribosome | translation                                       |
| 5           | 153       | structural constituent of ribosome | translation                                       |
| 7           | 575       | structural molecule activity       | establishment and/or maintenance of cell polarity |
| 8           | 1687      | structural constituent of ribosome | translation                                       |
| 9           | 289       | structural constituent of ribosome | translation                                       |

#### nsNMF Biclusters

| Cluster No. | No. genes | molecular function                 | biological process                  |
|-------------|-----------|------------------------------------|-------------------------------------|
| Factor 1    | 100       | structural constituent of ribosome | translation                         |
| Factor 2    | 100       | structural constituent of ribosome | antigen processing and presentation |

#### SAMBA Biclusters

| Cluster No. | No. genes | molecular function                 | biological process        |
|-------------|-----------|------------------------------------|---------------------------|
| 15          | 16        | zinc ion binding                   | regulation of cell growth |
| 18          | 10        | receptor activity                  | axon guidance             |
| 25          | 17        | structural constituent of ribosome | translation               |
| 26          | 16        | structural constituent of ribosome | translation               |
| 27          | 22        | structural constituent of ribosome | translation               |
| 28          | 22        | structural constituent of ribosome | translation               |
| 29          | 15        | structural constituent of ribosome | translation               |
| 30          | 16        | structural constituent of ribosome | translation               |
| 31          | 16        | structural constituent of ribosome | translation               |
| 32          | 16        | structural constituent of ribosome | translation               |
| 33          | 22        | structural constituent of ribosome | translation               |
| 34          | 28        | structural constituent of ribosome | translation               |
| 35          | 20        | structural constituent of ribosome | translation               |
| 36          | 19        | structural constituent of ribosome | translation               |
| 37          | 20        | structural constituent of ribosome | translation               |

**Table S.3 - Ontology results for van't Veer et al. breast cancer data for all biclustering algorithms**

Ontology results obtained for the biclustering algorithms Cheng and Church, ISA, OPSM, xMotif, OREO, nsNMF, and SAMBA using Onto-Express for the van't Veer et al. breast cancer data set. A hypergeometric distribution was used and the reference array was specified to be the 5,000 genes analyzed. Biclusters are only reported for each method if they have a p-value less than 0.01. Note that xMotif was unable to produce any biclusters as the number of samples (98) was too large for the method.

**Cheng and Church's Biclusters**

| Cluster No. | No. genes | molecular function                                                          | biological process                                      |
|-------------|-----------|-----------------------------------------------------------------------------|---------------------------------------------------------|
| 2           | 44        | 4-alpha-glucanotransferase                                                  | meiotic spindle organization and biogenesis             |
| 4           | 37        | aminomethyltransferase activity                                             | C21-steroid hormone metabolic process                   |
| 5           | 26        | acetyl-CoA transporter activity                                             | positive regulation of endothelial cell differentiation |
| 6           | 34        | none                                                                        | regulation of cytoskeleton organization and biogenesis  |
| 7           | 34        | glycine dehydrogenase activity                                              | generation of precursor metabolites and energy          |
| 8           | 32        | ceramide kinase activity                                                    | icosanoid biosynthetic process                          |
| 9           | 30        | 3-galactosyl-N-acetylglucosaminide<br>4-alpha-L-fucosyltransferase activity | axial mesoderm morphogenesis                            |
| 10          | 31        | cytokine activity                                                           | macroautophagy                                          |

**ISA Biclusters**

| Cluster No. | No. genes | molecular function                                    | biological process                                             |
|-------------|-----------|-------------------------------------------------------|----------------------------------------------------------------|
| 1           | 207       | heparin binding                                       | cell motility                                                  |
| 2           | 206       | heparin binding                                       | Notch signaling pathway                                        |
| 3           | 206       | structural constituent of ribosome                    | chromosome organization and biogenesis                         |
| 4           | 203       | heparin binding                                       | angiogenesis                                                   |
| 5           | 215       | GDP binding                                           | G-protein signaling, adenylate cyclase inhibiting pathway      |
| 6           | 210       | vitamin D receptor binding                            | chromosome organization and biogenesis                         |
| 7           | 207       | oxygen binding                                        | oxygen transport                                               |
| 8           | 207       | metabotropic glutamate, GABA-B like receptor activity | nucleosome assembly                                            |
| 9           | 203       | vitamin D receptor binding                            | C21-steroid hormone biosynthetic process                       |
| 10          | 197       | DNA binding                                           | chromosome organization and biogenesis (sensu Eukaryota)       |
| 11          | 196       | DNA binding                                           | chromosome organization and biogenesis (sensu Eukaryota)       |
| 12          | 259       | mRNA binding                                          | DNA damage response, signal transduction by p53 class mediator |
| 13          | 192       | none                                                  | zinc ion transport                                             |
| 14          | 244       | ErbB-3 class receptor binding                         | tricarboxylic acid cycle                                       |
| 15          | 180       | metal ion binding                                     | very-long-chain fatty acid metabolic process                   |

#### OPSM Biclusters

| Cluster No. | No. genes | molecular function                         | biological process                        |
|-------------|-----------|--------------------------------------------|-------------------------------------------|
| 1           | 2         | receptor signaling protein activity        | none                                      |
| 2           | 3         | MHC class II protein binding               | regulation of macrophage activation       |
| 3           | 5         | interleukin-3 receptor activity            | signal transduction                       |
| 4           | 10        | chemoattractant activity                   | regulation of progression through S phase |
| 5           | 16        | interleukin-10 receptor activity           | signal transduction                       |
| 6           | 35        | C-C chemokine receptor activity            | immune response                           |
| 7           | 59        | guanyl-nucleotide exchange factor activity | immune response                           |
| 8           | 115       | C-C chemokine receptor activity            | immune response                           |
| 9           | 221       | chemokine activity                         | immune response                           |
| 10          | 455       | MHC class I receptor activity              | immune response                           |
| 11          | 995       | chemokine activity                         | immune response                           |
| 12          | 2007      | transmembrane receptor activity            | immune response                           |

#### **OREO Biclusters**

| Cluster No. | No. genes | molecular function                                  | biological process                                                                              |
|-------------|-----------|-----------------------------------------------------|-------------------------------------------------------------------------------------------------|
| 1           | 116       | proteasome activator activity                       | immune response                                                                                 |
| 2           | 248       | isopentenyl-diphosphate<br>delta-isomerase activity | positive regulation of<br>alpha-beta T cell proliferation                                       |
| 5           | 1027      | MHC class II receptor activity                      | antigen processing and presentation of<br>peptide or polysaccharide antigen<br>via MHC class II |
| hline 6     | 31        | chemokine activity                                  | immune response                                                                                 |
| 8           | 28        | MHC class II receptor activity                      | antigen processing and presentation of<br>peptide or polysaccharide antigen<br>via MHC class II |
| hline 12    | 380       | structural constituent of ribosome                  | glycolysis                                                                                      |
| 14          | 271       | structural constituent of ribosome                  | translation                                                                                     |
| 17          | 23        | MHC class I receptor activity                       | antigen processing and presentation<br>of peptide antigen via MHC class I                       |
| 33          | 480       | 3-chloroallyl aldehyde<br>dehydrogenase activity    | intracellular signaling cascade                                                                 |
| 41          | 584       | structural constituent of ribosome                  | translation                                                                                     |
| 39          | 807       | MHC class II receptor activity                      | antigen processing and presentation of<br>peptide or polysaccharide antigen<br>via MHC class II |

#### nsNMF Biclusters

| Cluster No. | No. genes | molecular function | biological process              |
|-------------|-----------|--------------------|---------------------------------|
| Factor 1    | 200       | sugar binding      | immune response                 |
| Factor 2    | 200       | symporter activity | fatty acid biosynthetic process |

#### SAMBA Biclusters

| Cluster No. | No. genes | molecular function                                                  | biological process                           |
|-------------|-----------|---------------------------------------------------------------------|----------------------------------------------|
| 20          | 78        | extracellular matrix structural constituent                         | phosphate transport                          |
| 24          | 76        | aminoacyl-tRNA ligase activity                                      | tRNA aminoacylation for protein translation  |
| 27          | 87        | chemokine activity                                                  | immune response                              |
| 3           | 124       | chemokine activity                                                  | immune response                              |
| 30          | 137       | wide-spectrum protease inhibitor activity                           | homophilic cell adhesion                     |
| 31          | 146       | serine-type endopeptidase activity                                  | homophilic cell adhesion                     |
| 34          | 77        | chemokine activity                                                  | immune response                              |
| 36          | 34        | double-stranded DNA specific<br>5'-3' exodeoxyribonuclease activity | cell division                                |
| 77          | 88        | extracellular matrix structural constituent                         | phosphate transport                          |
| 78          | 34        | structural molecule activity                                        | epidermis development                        |
| 82          | 35        | steroid binding                                                     | very-long-chain fatty acid metabolic process |
| 84          | 39        | unspecific monooxygenase activity                                   | electron transport                           |
| 87          | 135       | unspecific monooxygenase activity                                   | pigmentation                                 |
| 93          | 51        | unspecific monooxygenase activity                                   | electron transport                           |
| 94          | 45        | unspecific monooxygenase activity                                   | electron transport                           |

## References

- [1] M. J. Brauer, J. Yuan, B. Bennett, W. Lu, E. Kimball, D. Bostein, and J.D. Rabinowitz. Conservation of the metabolomic response to starvation across two divergent microbes. *Proc. Natl. Acad. Sci.*, 103:19302–19307, 2006.
- [2] Y. Cheng and G.M. Church. Biclustering of expression data. *Proc. ISMB 2000*, pages 93–103, 2000.
- [3] J. Ihmels, G. Friedlander, S. Bergmann, O. Sarig, Y. Ziv, and N. Barkai. Revealing modular organization in the yeast transcriptional network. *Nat. Genet.*, 31:370–377, 2002.



- [4] A. Ben-Dor, B. Chor, R.Karp, and Z.Yakhini. Discovering local structure in gene expression data: The order-preserving submatrix problem. In *RECOMB*, 2002.
- [5] A. Prelic, S. Bleuler, P. Zimmermann, A. Wille, P. Buhlmann, W. Gruissem, L. Hennig, L. Thiele, and E. Zitzler. A systematic comparison and evaluation of biclustering methods for gene expression data. *Bioinformatics*, 22(9):1122–1129, 2006.
- [6] A. Tanay, R. Sharan, and R. Shamir. Discovering statistically significant biclusters in gene expression data. *Bioinformatics*, 18:S136–S144, 2002.
- [7] C. Cotta, A. Mendes, V. Garcia, P. Franca, and P. Moscato. Applying Memetic algorithms to the analysis of microarray data. In *Lecture notes in computer science*, pages 22–32. Springer-Verlag Berlin, 2003.
- [8] R. Shamir and R. Sharan. Algorithmic approaches to clustering gene expression data. In T. Jiang, T. Smith, Y. Xu, and M. Zhang, editors, *Current Topics in Computational Biology*, pages 269–299. MIT Press, 2002.
- [9] M. B. Eisen, P. T. Spellman, P. O. Brown, and D. Botstein. Cluster analysis and display of genome-wide expression patterns. *Proc. Natl. Acad. Sci.*, 95:14863–14868, 1998.
- [10] J. Vilo, M. Kapushesky, P. Kemmeren, U. Sarkans, and A. Brazma. *Expression Profiler*. Springer-Valeg, 2003.
- [11] P. Moscato, A. Mendes, and R. Berretta. Benchmarking a Memetic algorithm for ordering microarray data. *Biosystems*, 88(1):56–75, 2007.
- [12] U. Alon, N. Barkai, D.A. Notterman, K. Gish, S. Ybarra, D. Mack, and A.J. Levine. Broad patterns of gene expression revealed by clustering analysis of tumor and normal colon tissues probed by oligonucleotide arrays. *Proc. Natl. Acad. Sci.*, 96:6745–6750, 1999.

- [13] T. Reguly, A. Breitkreutz, L. Boucher, B. Breitkreutz, G. Hon, C.L. Myers, A. Parsons, H. Friesen, R. Oughtred, A. Tong, Y. Ho, D. Botstein, B. Andrews, C. Boone, O.G. Troyanskya, T. Ideker, K. Dolinski, N.N. Batada, and M. Tyers. Comprehensive curation and analysis of global interaction networks in *saccharomyces cerevisiae*. *Journal of Biology*, 5(11):1–38, 2006.

## List of Figures

|      |                                                                                                                                                                                                                                                                                                                |    |
|------|----------------------------------------------------------------------------------------------------------------------------------------------------------------------------------------------------------------------------------------------------------------------------------------------------------------|----|
| S.1  | Biclustering Results for Cheng and Church’s Algorithm . . . . .                                                                                                                                                                                                                                                | 21 |
| S.2  | Biclustering Results for Cheng and Church’s Algorithm: Enlarged . .                                                                                                                                                                                                                                            | 22 |
| S.3  | Biclustering Results for Cheng and Church’s Algorithm: Enlarged . .                                                                                                                                                                                                                                            | 23 |
| S.4  | Biclustering Results for ISA Algorithm . . . . .                                                                                                                                                                                                                                                               | 24 |
| S.5  | Biclustering Results for OPSM Algorithm . . . . .                                                                                                                                                                                                                                                              | 25 |
| S.6  | Biclustering Results for BiMax Algorithm . . . . .                                                                                                                                                                                                                                                             | 26 |
| S.7  | Biclustering Results for SAMBA Algorithm . . . . .                                                                                                                                                                                                                                                             | 27 |
| S.8  | The clustering results for OREO, a Memetic algorithm, EBI hierarchical clustering, agglomerative hierarchical clustering, and CLICK for the Lenna image replicated row-wise ten times. Note that the only two methods able to recover the correct ordering are OREO and the Memetic algorithm. . . . .         | 28 |
| S.9  | The clustering results for OREO, a Memetic algorithm, EBI hierarchical clustering, agglomerative hierarchical clustering, and CLICK for the partial Lenna image replicated row-wise ten times. Note that the only two methods able to recover the correct ordering are OREO and the Memetic algorithm. . . . . | 29 |
| S.10 | Average bicluster relevance for OREO for constant, non-overlapping biclusters. . . . .                                                                                                                                                                                                                         | 30 |
| S.11 | Average module recovery for OREO for constant, non-overlapping biclusters. . . . .                                                                                                                                                                                                                             | 31 |
| S.12 | Average bicluster relevance for OREO for additive, non-overlapping biclusters. . . . .                                                                                                                                                                                                                         | 32 |
| S.13 | Average module recovery for OREO for additive, non-overlapping biclusters. . . . .                                                                                                                                                                                                                             | 33 |
| S.14 | Average bicluster relevance for OREO for constant, overlapping biclusters. . . . .                                                                                                                                                                                                                             | 34 |
| S.15 | Average module recovery for OREO for constant, overlapping biclusters.                                                                                                                                                                                                                                         | 35 |
| S.16 | Average bicluster relevance for OREO for additive, overlapping biclusters. . . . .                                                                                                                                                                                                                             | 36 |
| S.17 | Average module recovery for OREO for additive, overlapping biclusters.                                                                                                                                                                                                                                         | 37 |
| S.18 | Absolute value of average correlation values among rows for metabolite concentration data as a function of bicluster area. . . . .                                                                                                                                                                             | 38 |
| S.19 | Absolute value of average correlation values among rows for metabolite concentration data as a function of bicluster row size. . . . .                                                                                                                                                                         | 39 |
| S.20 | Absolute value of average correlation values among columns for metabolite concentration data as a function of bicluster area. . . . .                                                                                                                                                                          | 40 |
| S.21 | Absolute value of average correlation values among columns for metabolite concentration data as a function of bicluster column size. . . . .                                                                                                                                                                   | 41 |
| S.22 | Absolute value of average correlation values among rows for colon cancer data as a function of bicluster area. . . . .                                                                                                                                                                                         | 42 |

|      |                                                                                                                                   |    |
|------|-----------------------------------------------------------------------------------------------------------------------------------|----|
| S.23 | Absolute value of average correlation values among rows for colon cancer data as a function of bicluster row size. . . . .        | 43 |
| S.24 | Absolute value of average correlation values among columns for colon cancer data as a function of bicluster area. . . . .         | 44 |
| S.25 | Absolute value of average correlation values among columns for colon cancer data as a function of bicluster column size. . . . .  | 45 |
| S.26 | Absolute value of average correlation values among rows for breast cancer data as a function of bicluster area. . . . .           | 46 |
| S.27 | Absolute value of average correlation values among rows for breast cancer data as a function of bicluster row size. . . . .       | 47 |
| S.28 | Absolute value of average correlation values among columns for breast cancer data as a function of bicluster area. . . . .        | 48 |
| S.29 | Absolute value of average correlation values among columns for breast cancer data as a function of bicluster column size. . . . . | 49 |

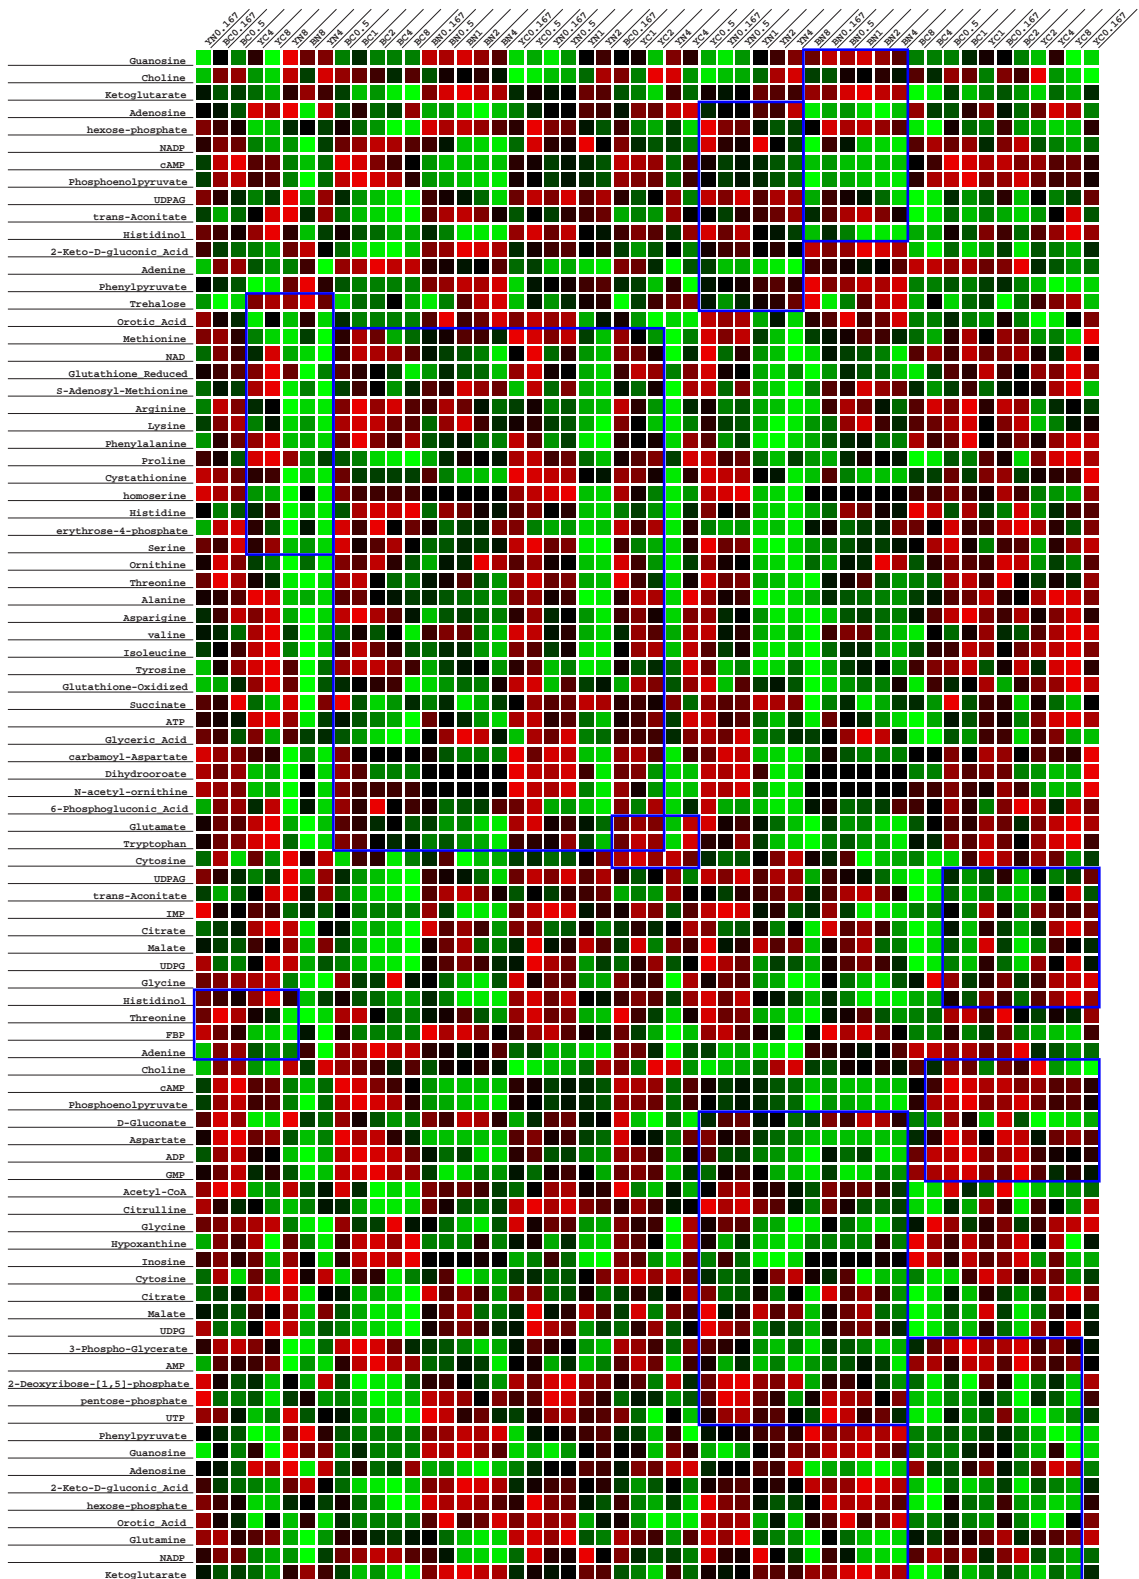

Figure S.1: Biclustering Results for Cheng and Church's Algorithm

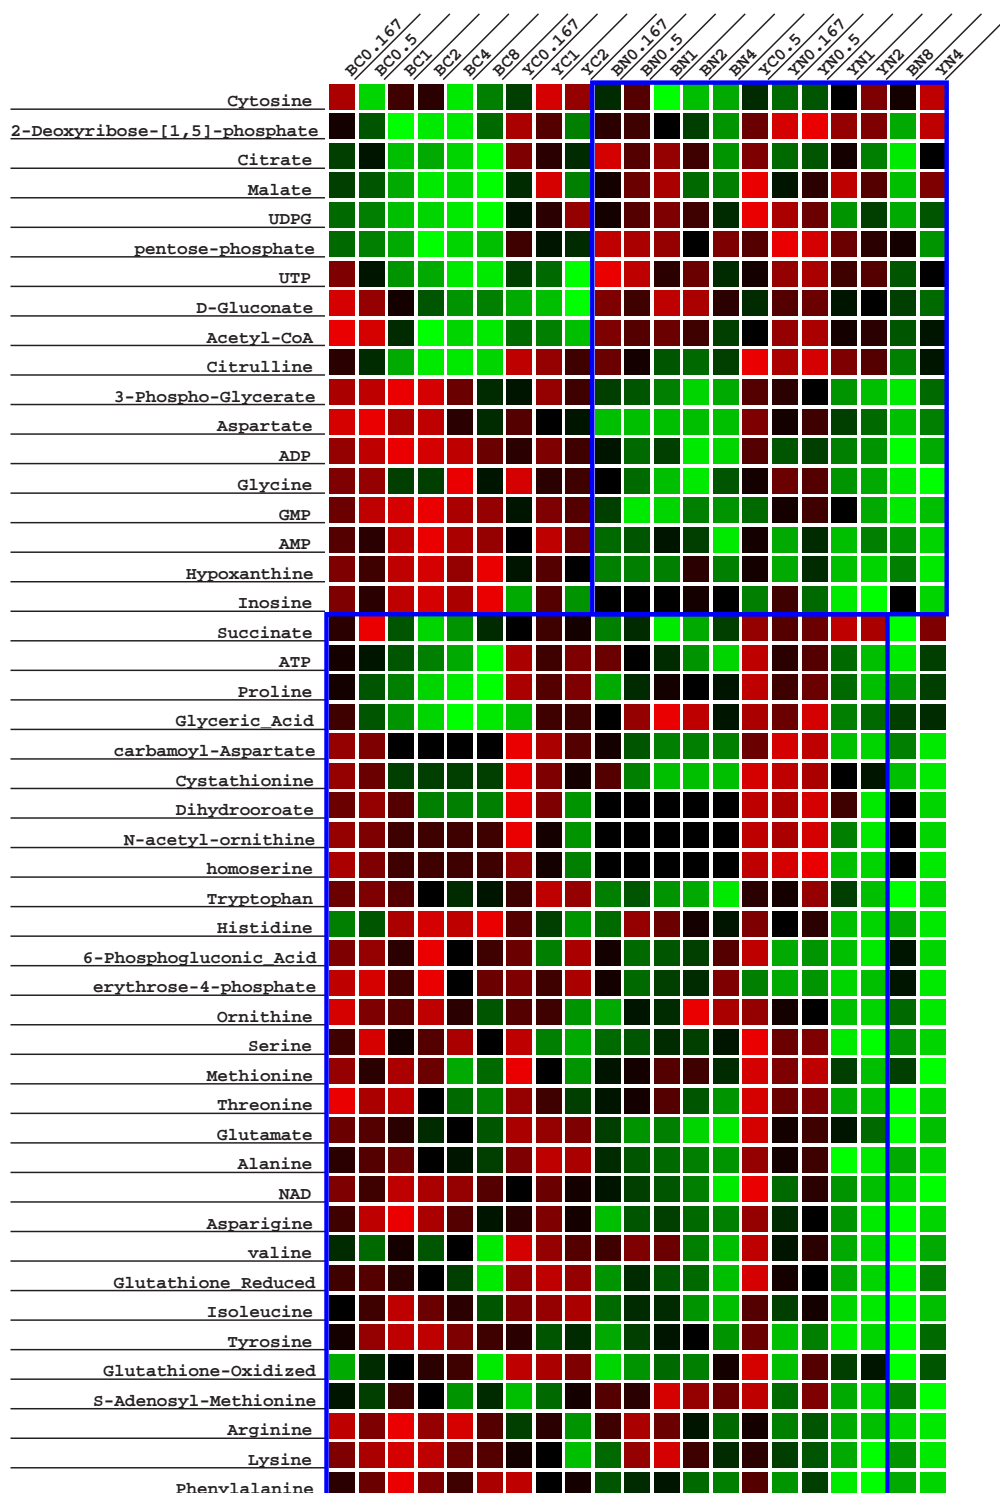

Figure S.2: Biclustering Results for Cheng and Church's Algorithm: Enlarged



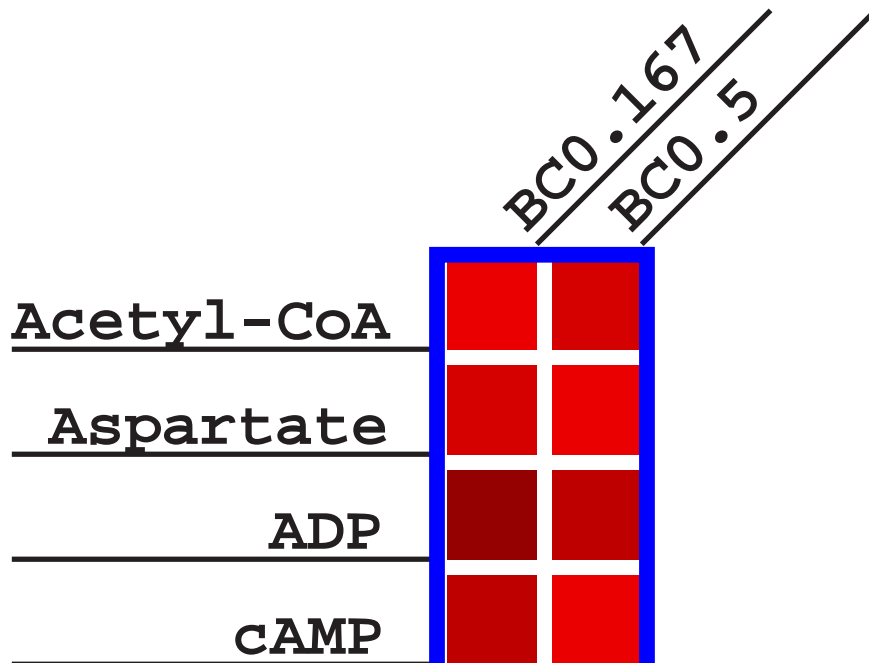

Figure S.4: Biclustering Results for ISA Algorithm



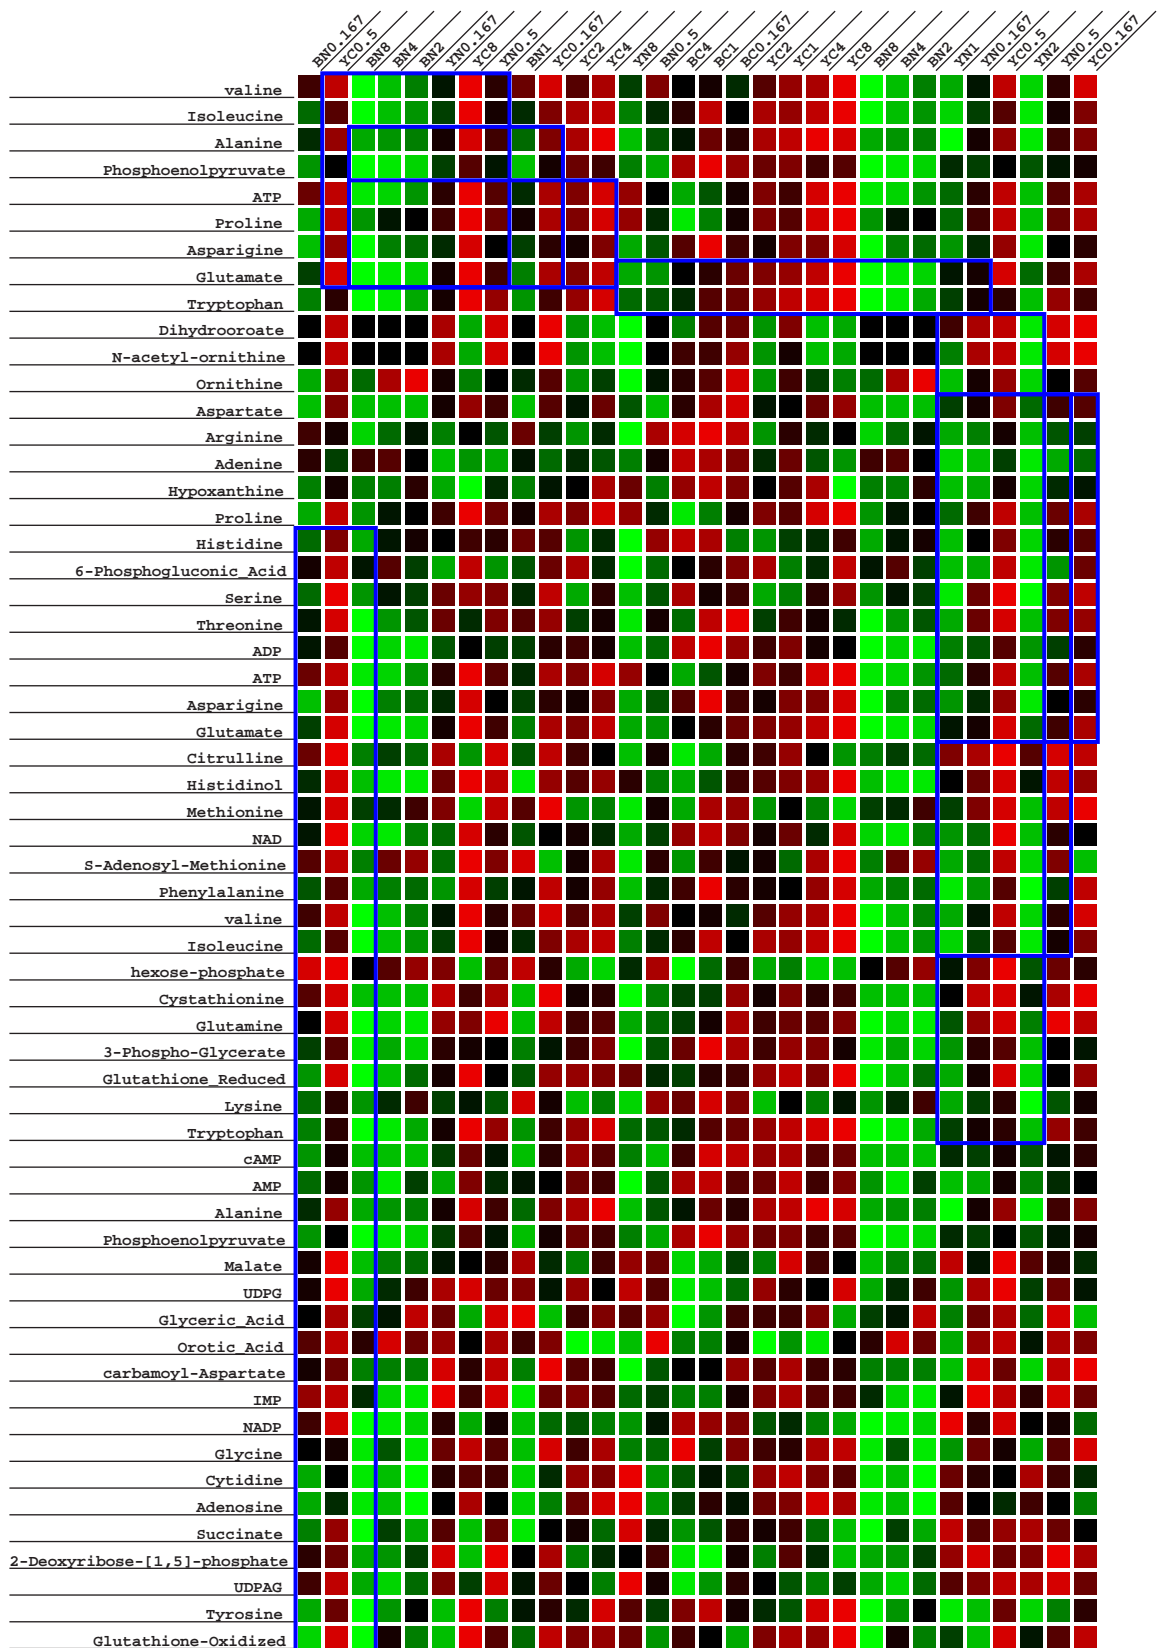

Figure S.5: Biclustering Results for OPSM Algorithm

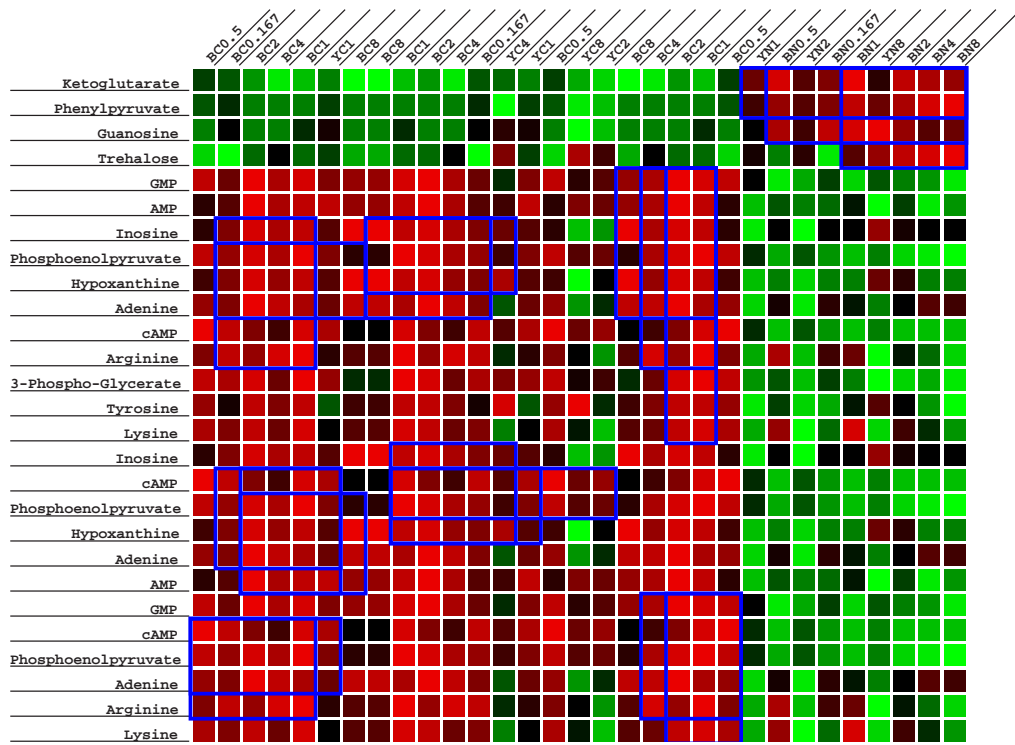

Figure S.6: Biclustering Results for BiMax Algorithm

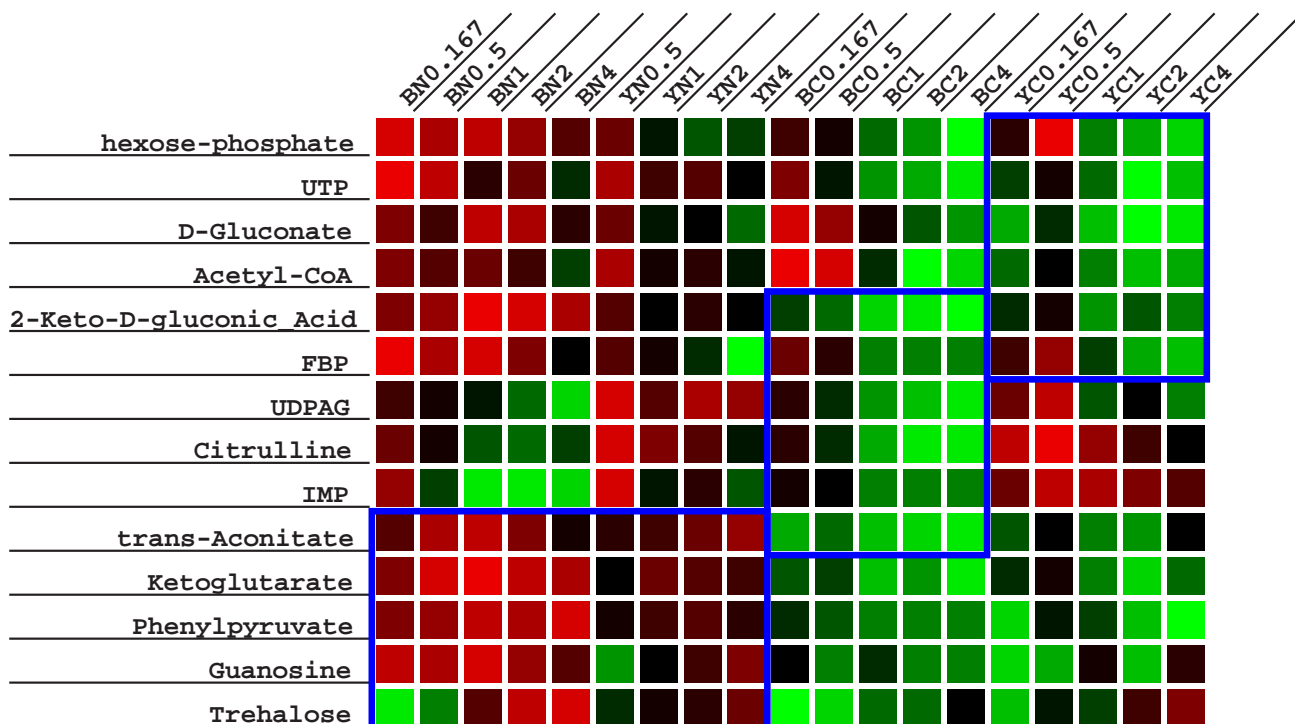

Figure S.7: Biclustering Results for SAMBA Algorithm

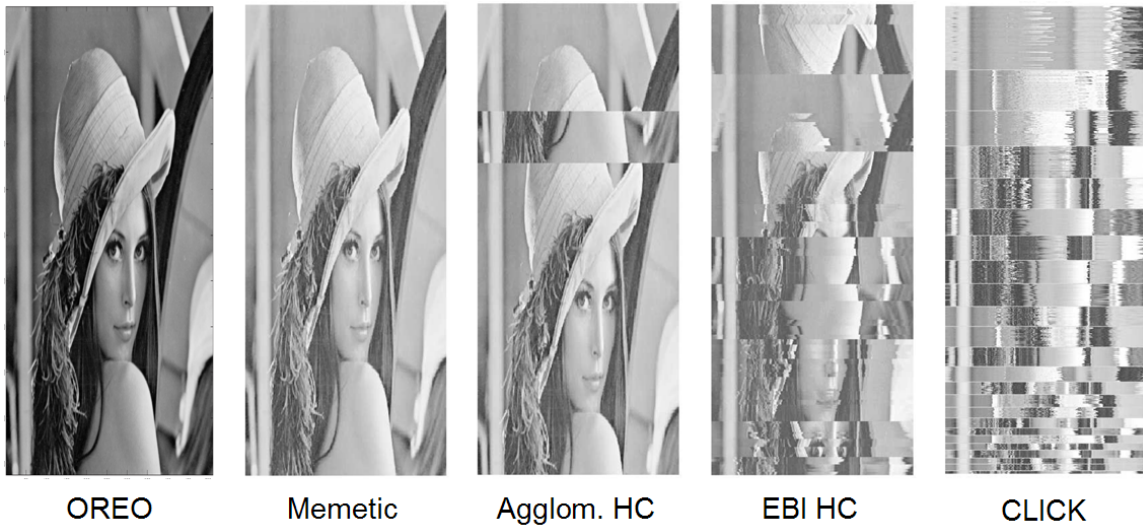

Figure S.8: The clustering results for OREO, a Memetic algorithm, EBI hierarchical clustering, agglomerative hierarchical clustering, and CLICK for the Lenna image replicated row-wise ten times. Note that the only two methods able to recover the correct ordering are OREO and the Memetic algorithm.

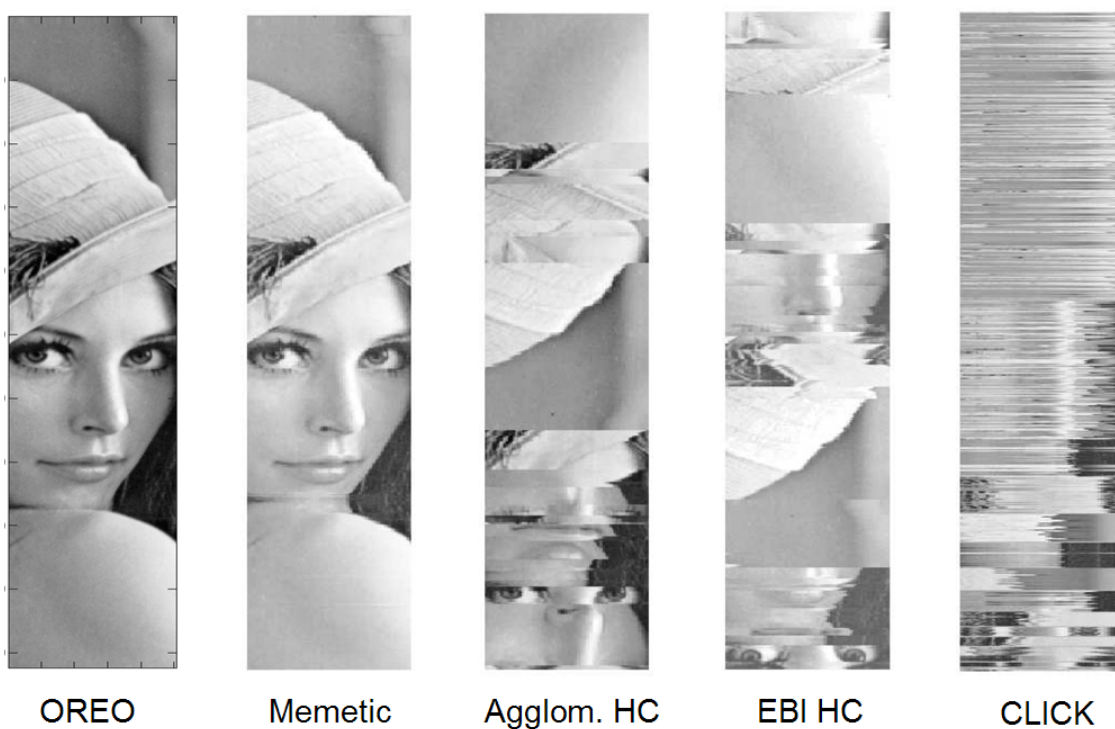

Figure S.9: The clustering results for OREO, a Memetic algorithm, EBI hierarchical clustering, agglomerative hierarchical clustering, and CLICK for the partial Lenna image replicated row-wise ten times. Note that the only two methods able to recover the correct ordering are OREO and the Memetic algorithm.

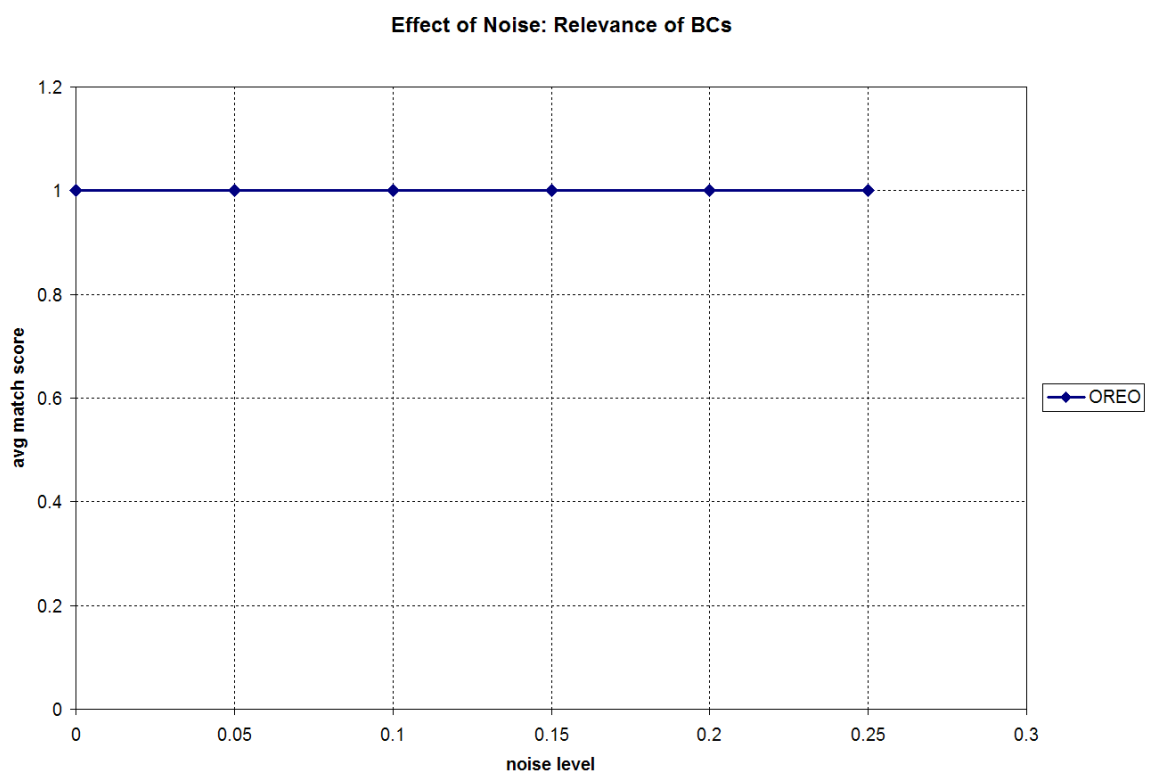

Figure S.10: Average bicluster relevance for OREO for constant, non-overlapping biclusters.

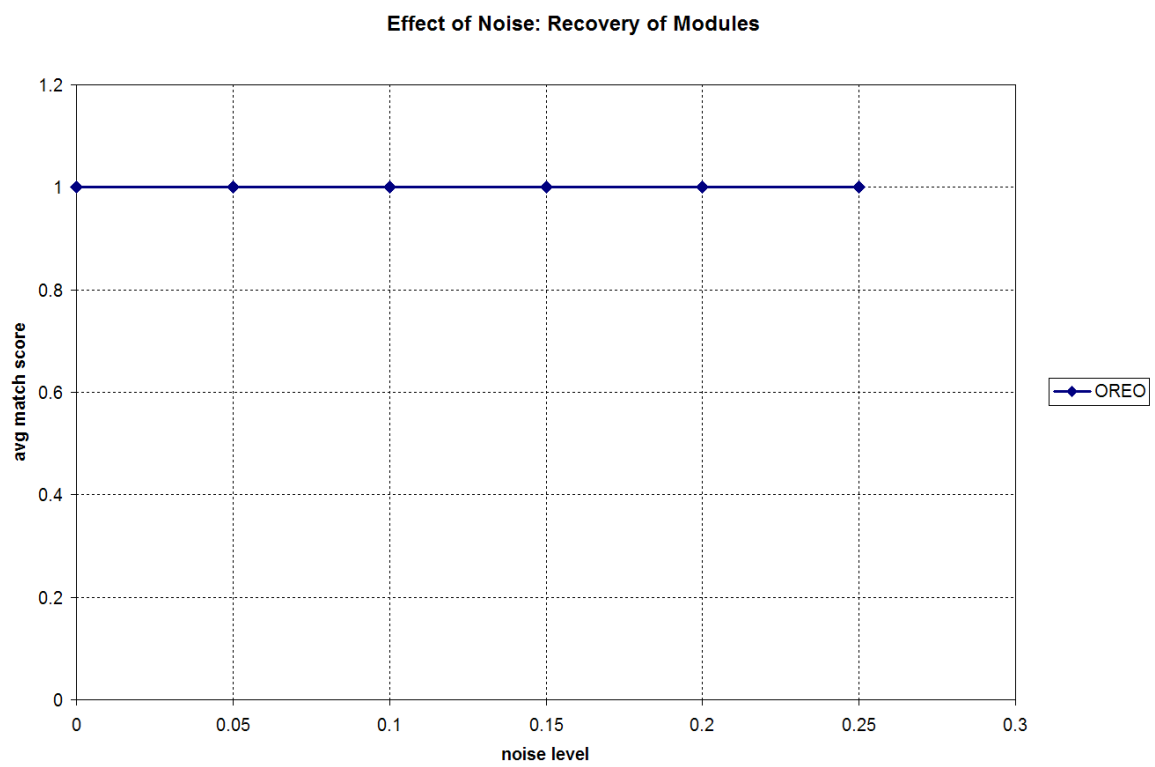

Figure S.11: Average module recovery for OREO for constant, non-overlapping bi-clusters.

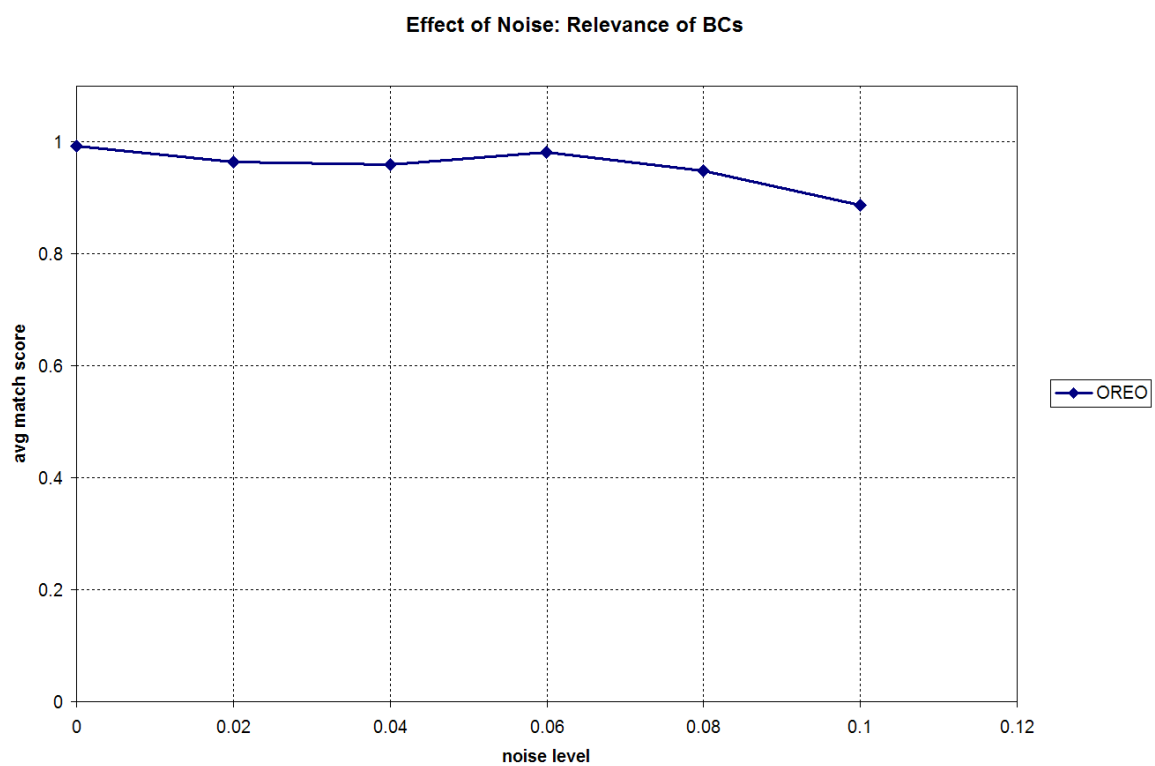

Figure S.12: Average bicluster relevance for OREO for additive, non-overlapping biclusters.



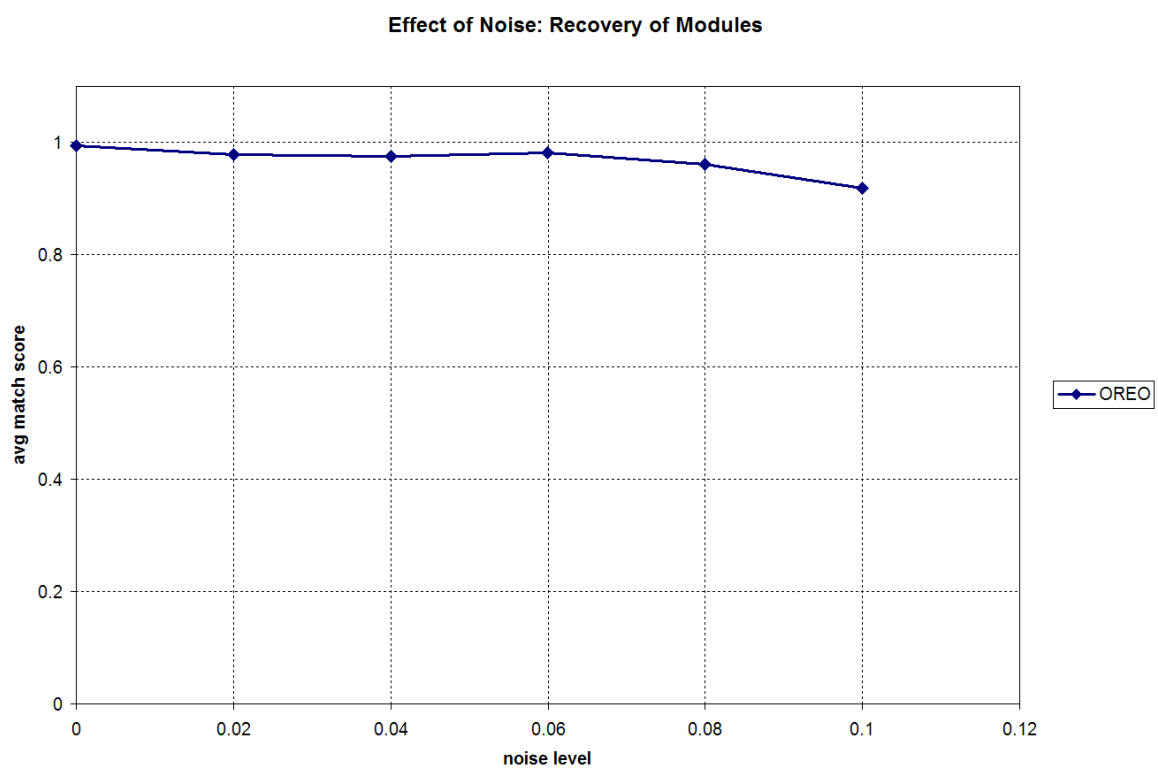

Figure S.13: Average module recovery for OREO for additive, non-overlapping bi-clusters.

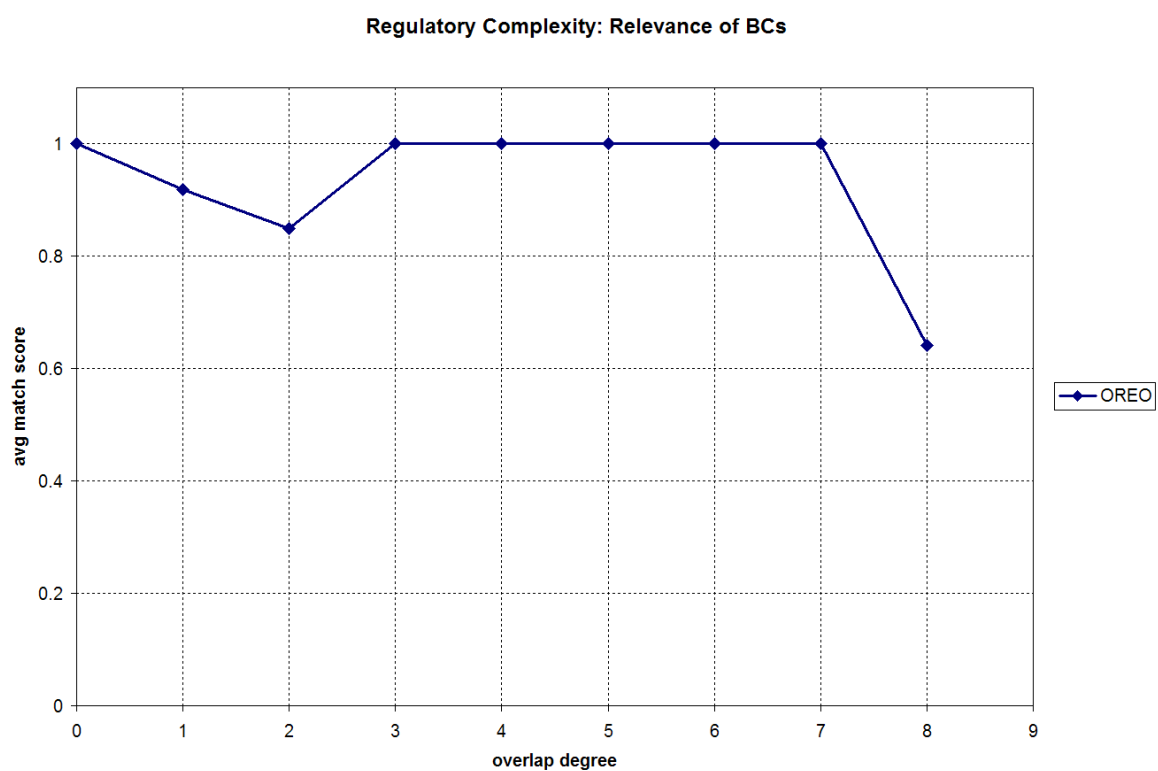

Figure S.14: Average bicluster relevance for OREO for constant, overlapping biclusters.

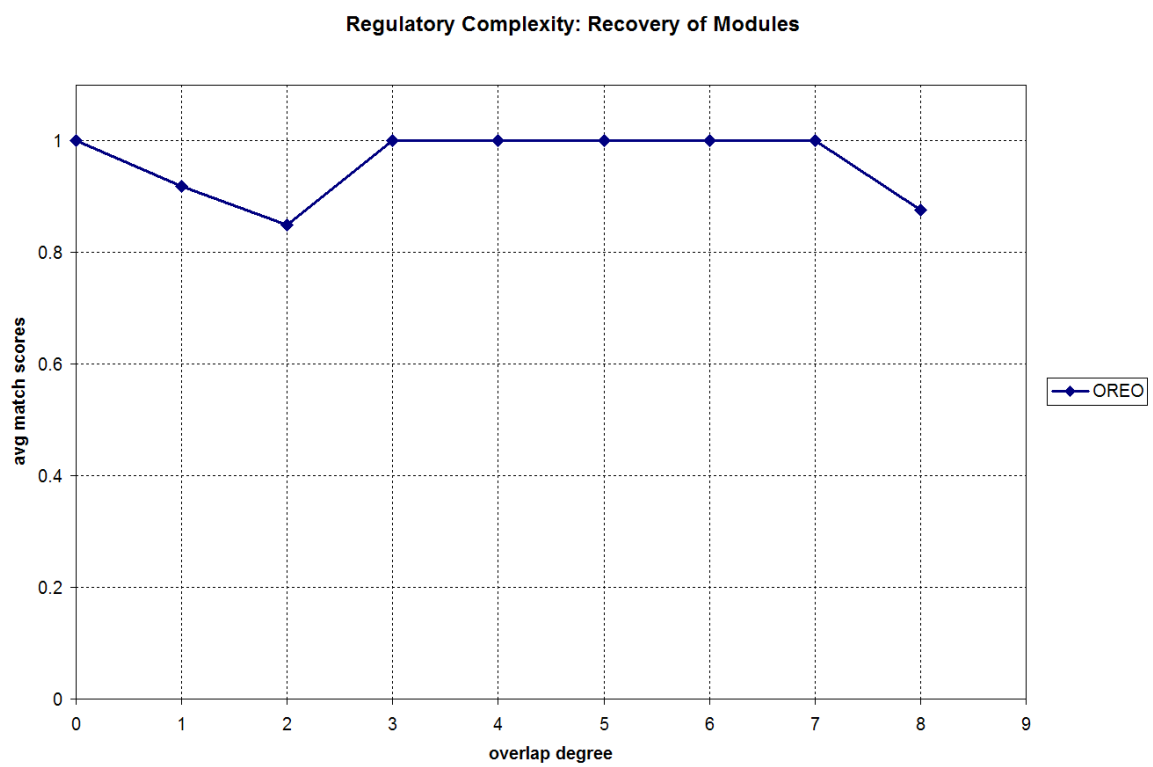

Figure S.15: Average module recovery for OREO for constant, overlapping biclusters.

Regulatory Complexity: Relevance of BCs

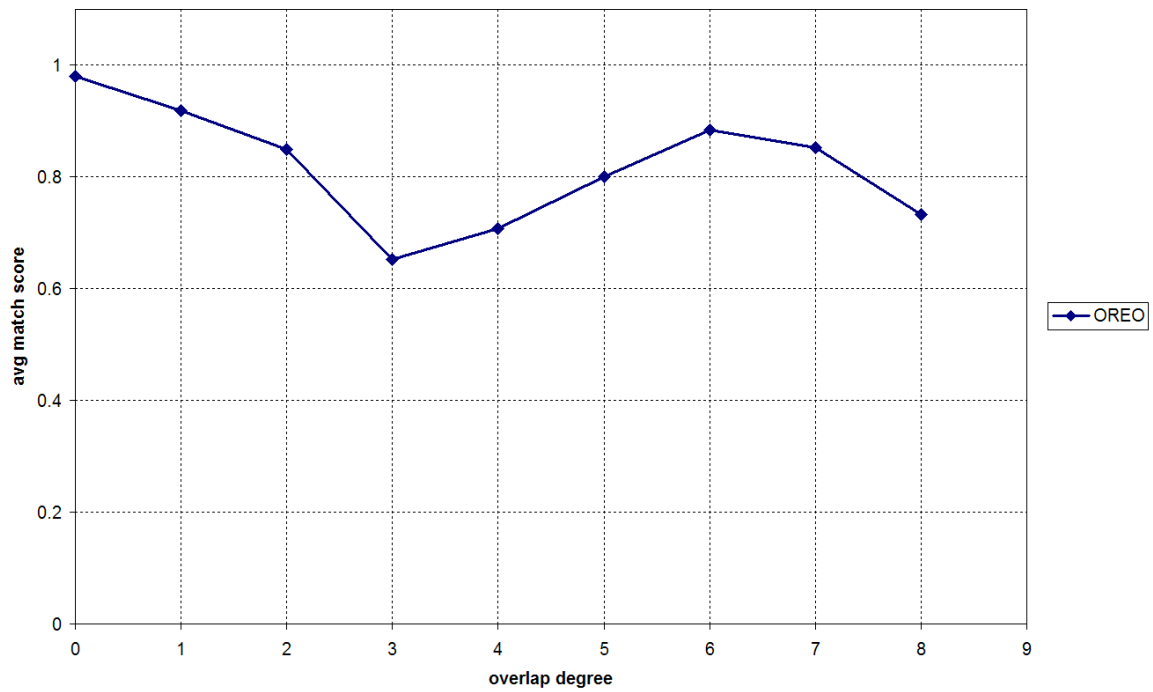

Figure S.16: Average bicluster relevance for OREO for additive, overlapping biclusters.

Regulatory Complexity: Recovery of Modules

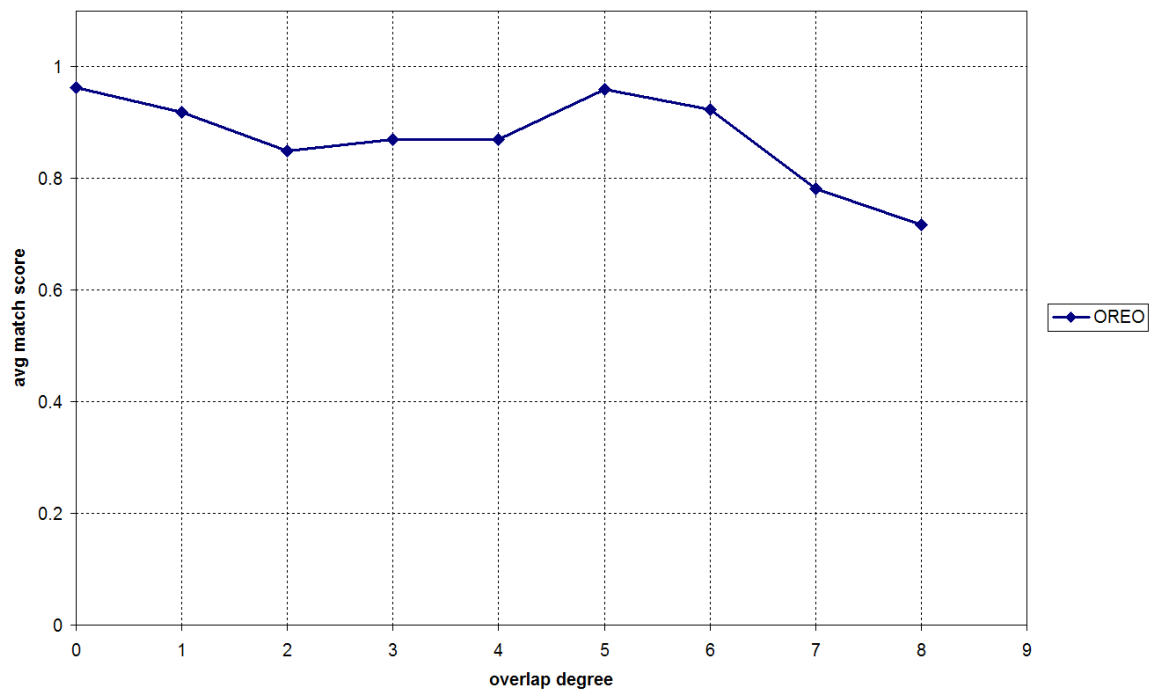

Figure S.17: Average module recovery for OREO for additive, overlapping biclusters.

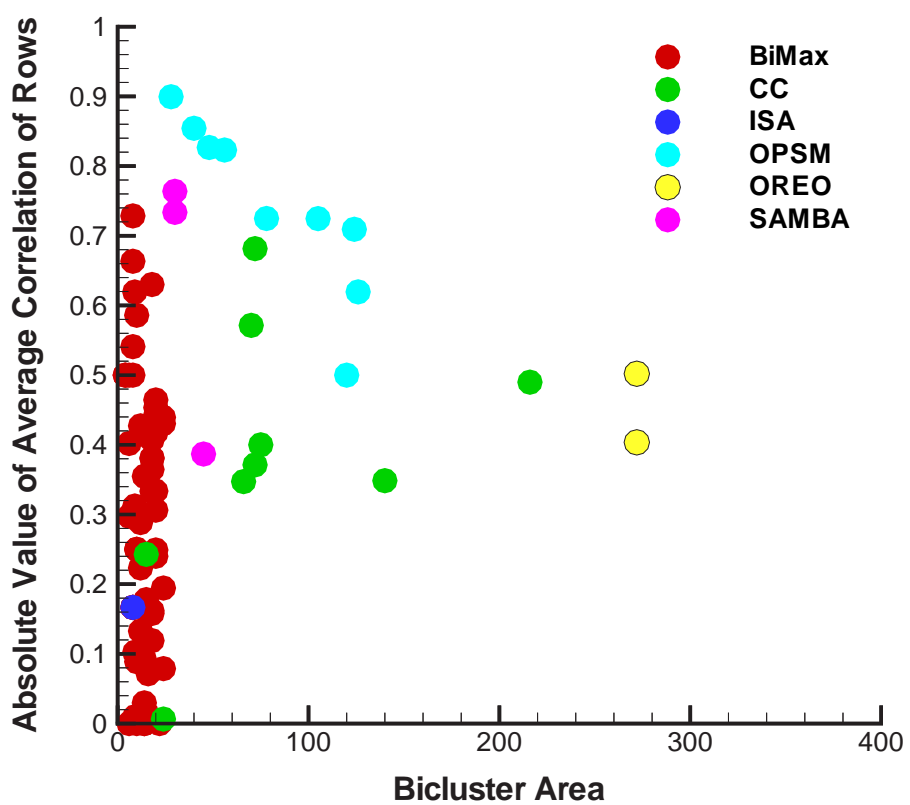

Figure S.18: Absolute value of average correlation values among rows for metabolite concentration data as a function of bicluster area.

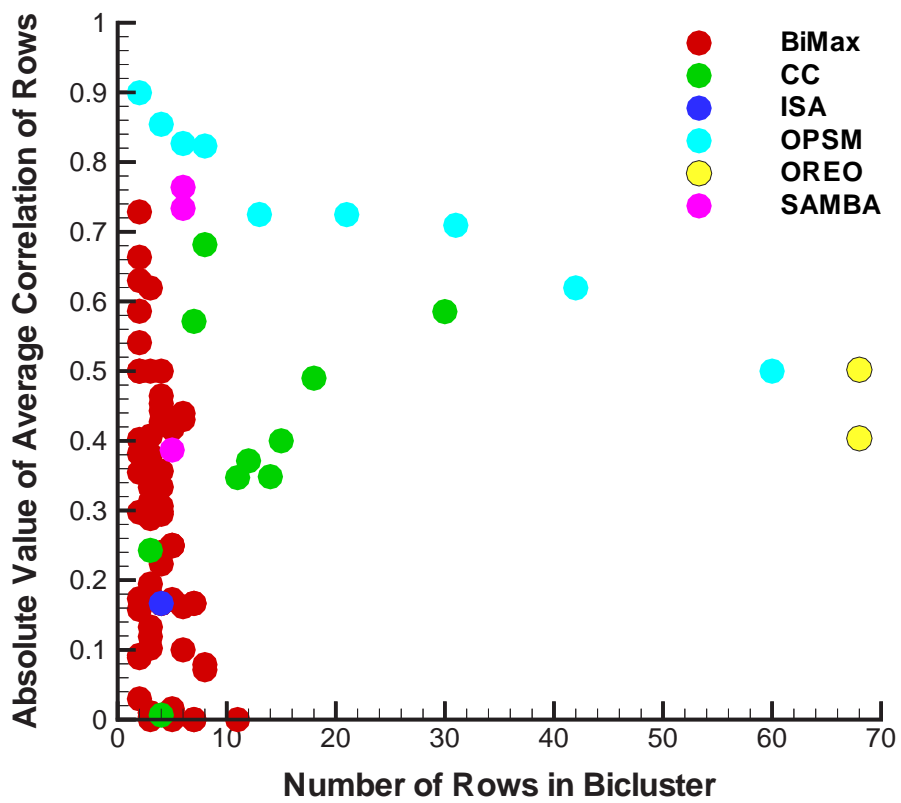

Figure S.19: Absolute value of average correlation values among rows for metabolite concentration data as a function of bicluster row size.

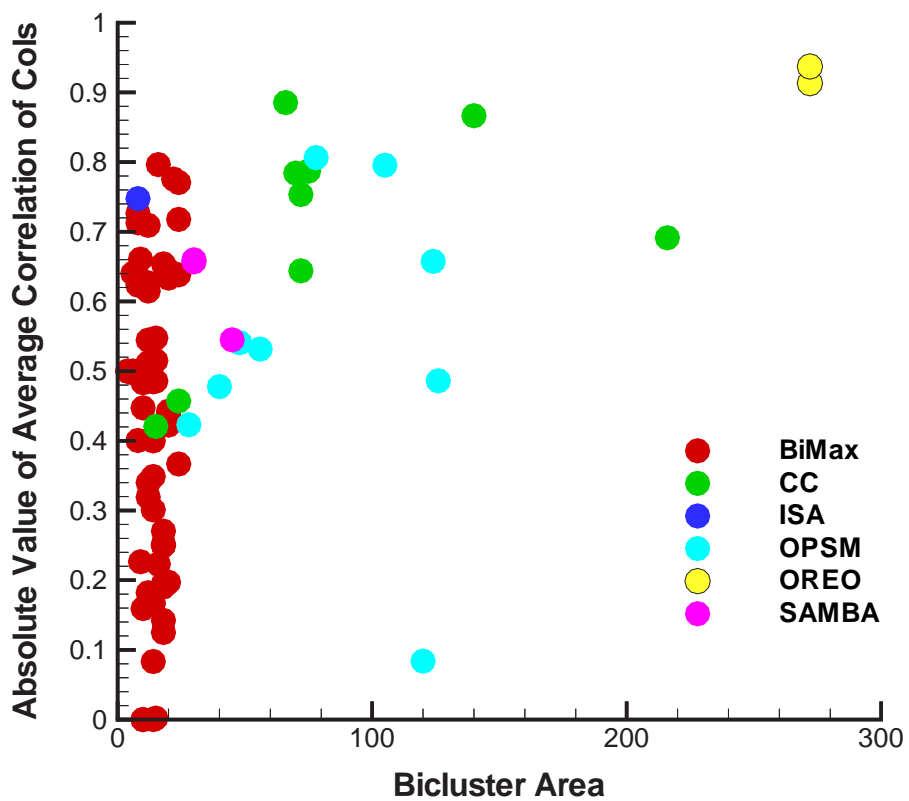

Figure S.20: Absolute value of average correlation values among columns for metabolite concentration data as a function of bicluster area.



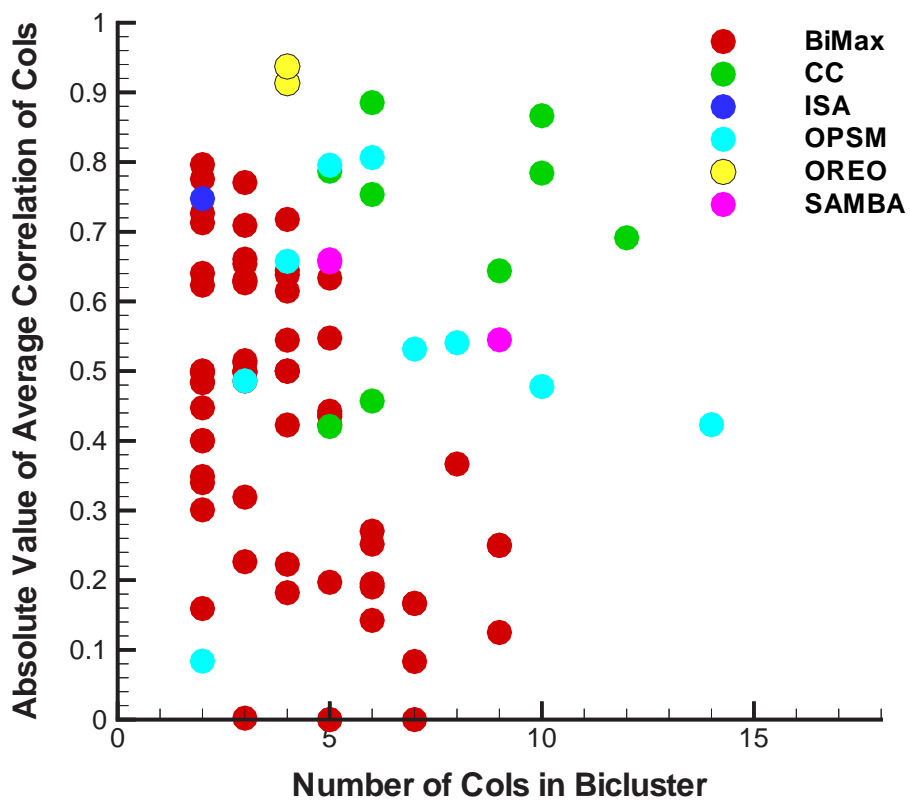

Figure S.21: Absolute value of average correlation values among columns for metabolite concentration data as a function of bicluster column size.

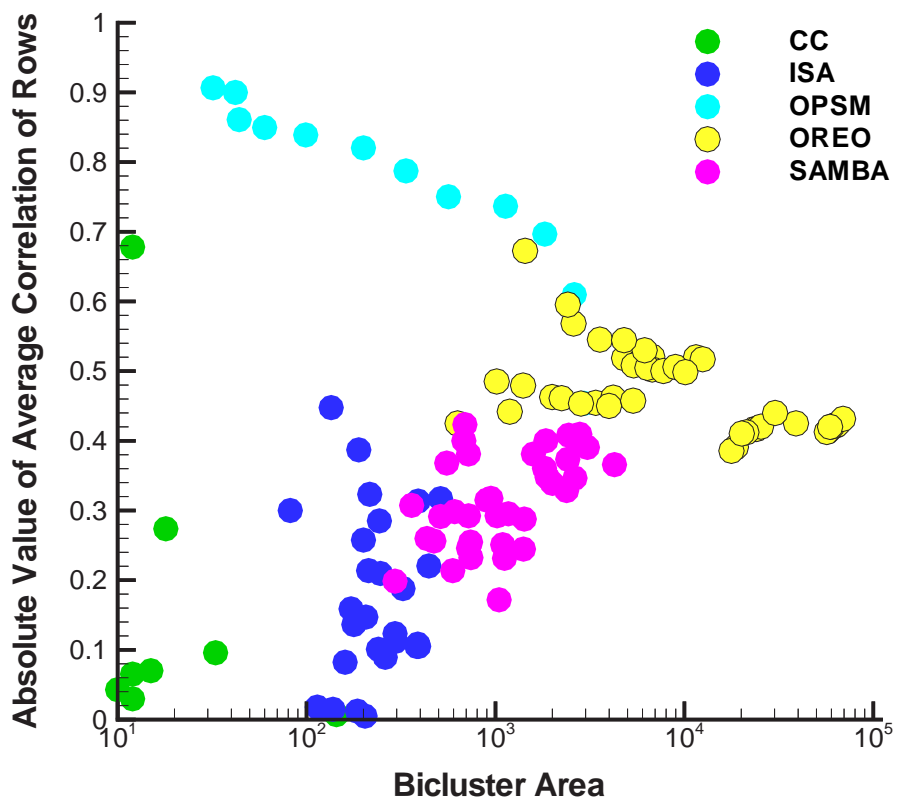

Figure S.22: Absolute value of average correlation values among rows for colon cancer data as a function of bicluster area.

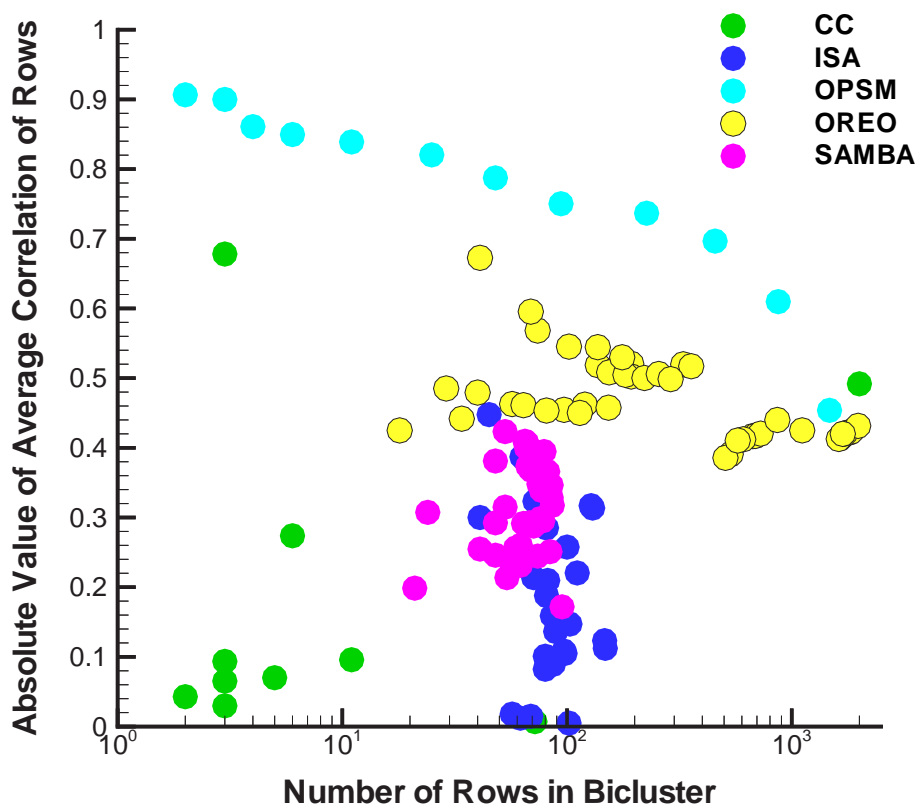

Figure S.23: Absolute value of average correlation values among rows for colon cancer data as a function of bicluster row size.

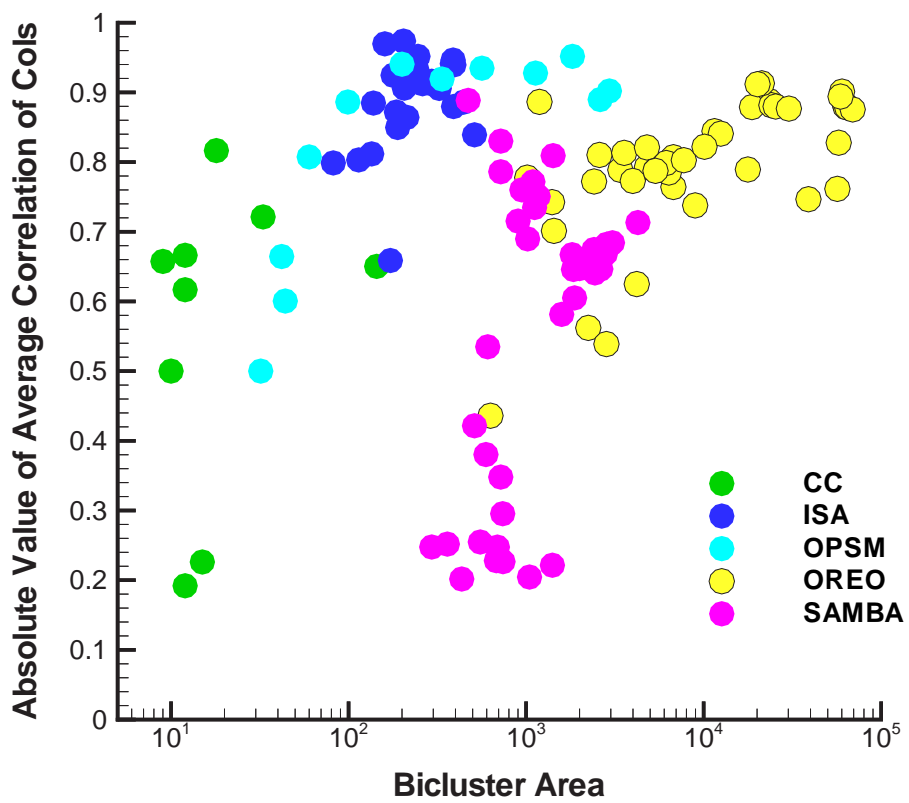

Figure S.24: Absolute value of average correlation values among columns for colon cancer data as a function of bicluster area.

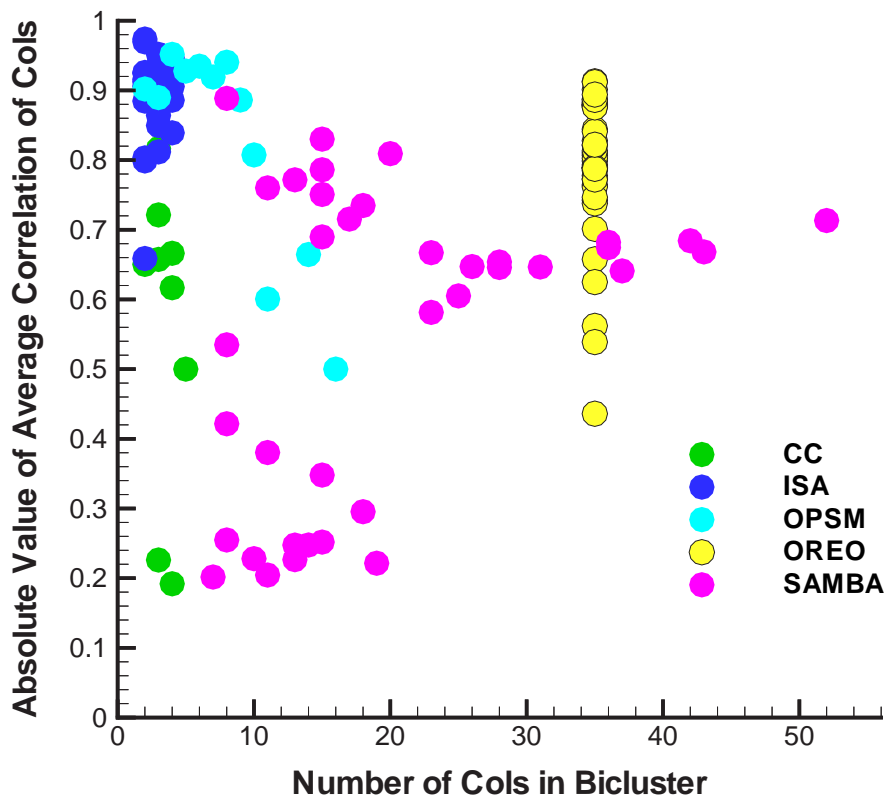

Figure S.25: Absolute value of average correlation values among columns for colon cancer data as a function of bicliaster column size.

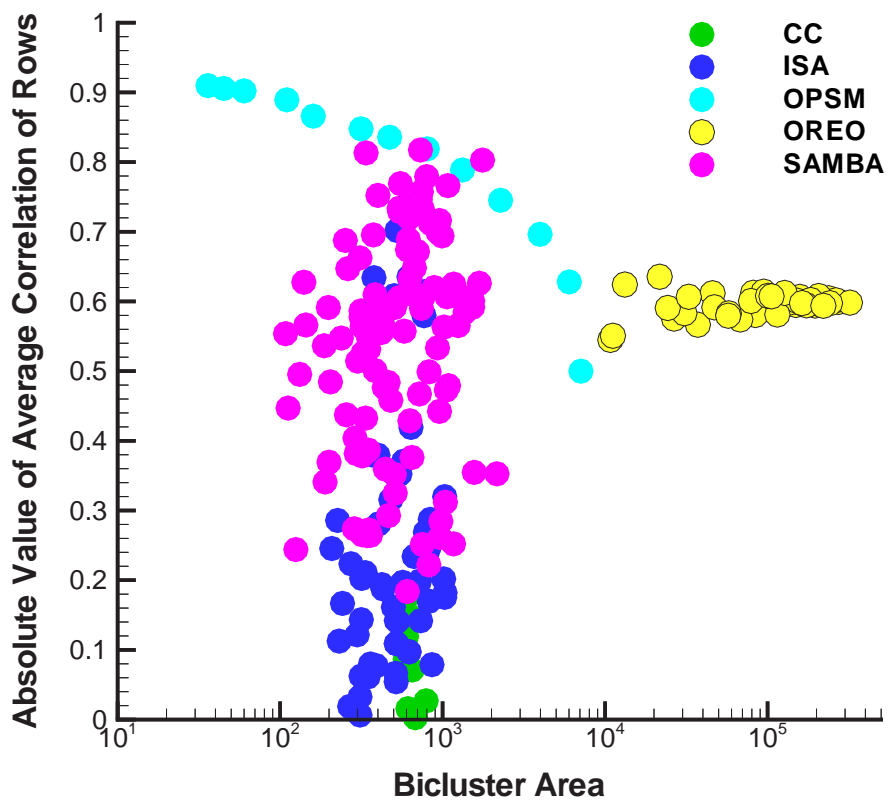

Figure S.26: Absolute value of average correlation values among rows for breast cancer data as a function of bicluster area.

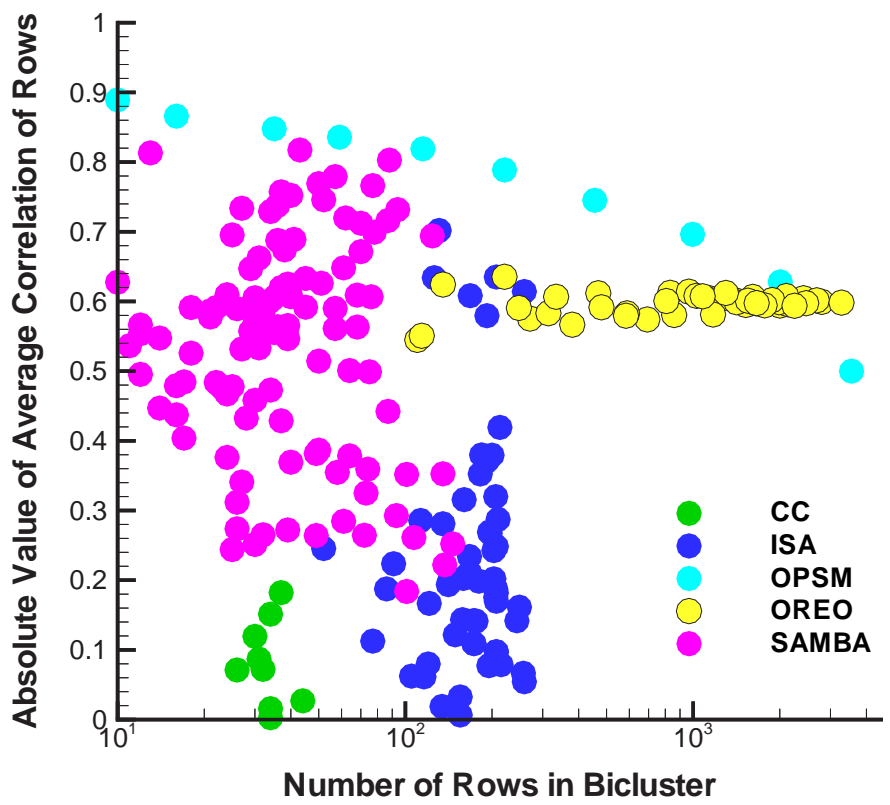

Figure S.27: Absolute value of average correlation values among rows for breast cancer data as a function of bicluster row size.

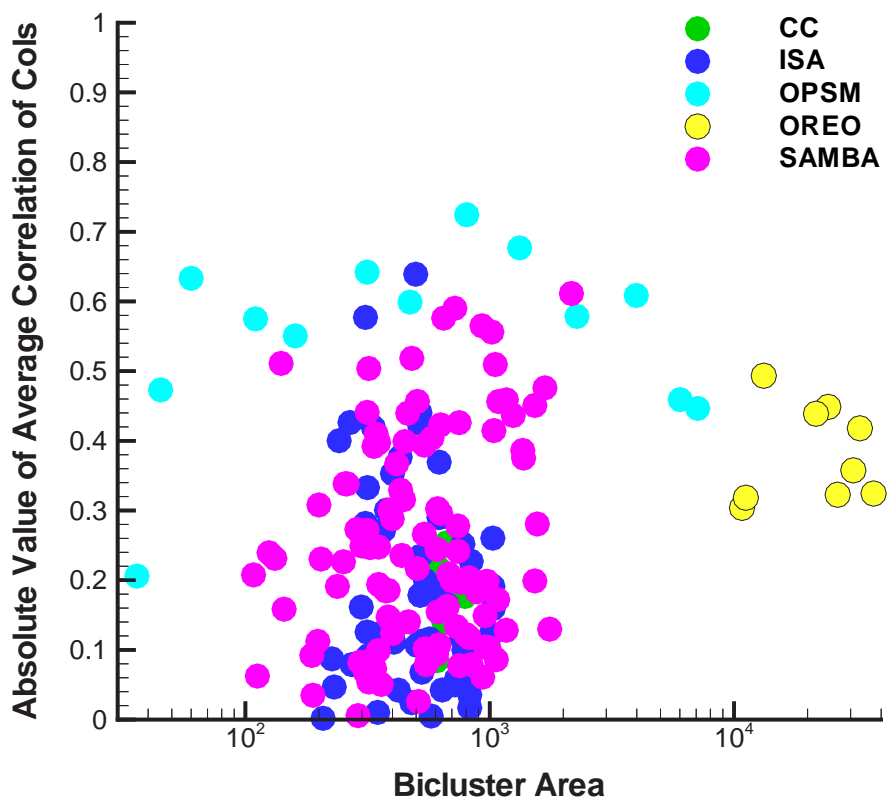

Figure S.28: Absolute value of average correlation values among columns for breast cancer data as a function of bicluster area.



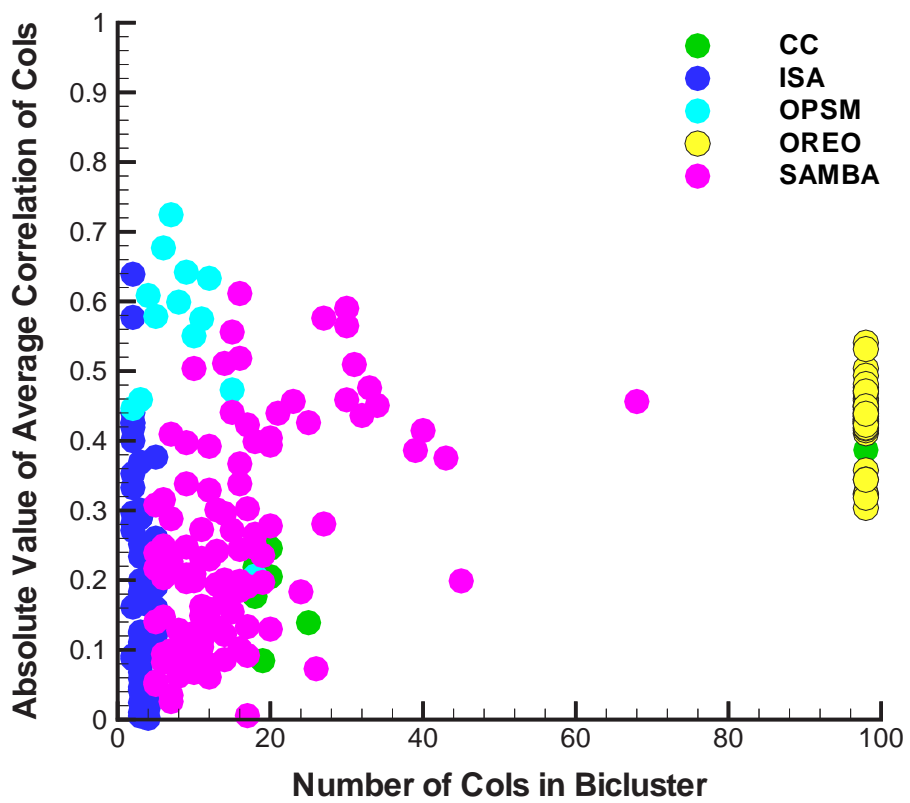

Figure S.29: Absolute value of average correlation values among columns for breast cancer data as a function of bicluster column size.

## List of Tables

- S.1 Separation of Tumor and Normal Tissues for Alon et al. and OREO for colon cancer data set. The entries in bold indicate a misclassification. 51

| Method      | Tumor Rich Tissues                                                                                                                                                                                                            | Normal Rich Tissues                                                                                                                                                           |
|-------------|-------------------------------------------------------------------------------------------------------------------------------------------------------------------------------------------------------------------------------|-------------------------------------------------------------------------------------------------------------------------------------------------------------------------------|
| Alon et al. | T16, T28, T13, T9, T21, T35,<br>T10, T27, T8, T5, T4, T1,<br>T15, T26, T39, T11, T6, T19,<br>T12, T22, T34, T7, <b>N8</b> , T3,<br><b>N12</b> , T17, T25, T18, T23, T31,<br>T20, <b>N34</b> , T24, T29, T38, T14,<br>T40, T32 | N9, <b>T30</b> , <b>T36</b> , N6, <b>T33</b> ,<br>N11, N1, N39, N28, N35,<br>N32, N4, N33, N7, <b>T37</b> ,<br>N5, N27, N3, N2, N40,<br>N36, <b>T2</b> , N29, N10             |
| OREO        | T2, T37, T25, T17, T14, T15,<br>T18, T4, T1, T11, T19, T23,<br>T16, T5, T10, T34, T24, T26,<br>T12, T9, T21, T6, T20, T29,<br>T31, T32, T8, T13, T22, T38,<br>T28, T35, <b>N34</b> , T27, T39,<br><b>N8</b> , <b>N7</b>       | <b>T7</b> , <b>T3</b> , N36, <b>T40</b> , N40<br>N33, N27, N35, <b>T36</b> , N28,<br>N29, <b>T30</b> , N32, N39, <b>T33</b> ,<br>N1, N6, N2, N11, N5,<br>N4, N3, N10, N9, N12 |

Table S.1: Separation of Tumor and Normal Tissues for Alon et al. and OREO for colon cancer data set. The entries in bold indicate a misclassification.
